# Supplementary material for: Photocatalytic aerobic oxidation of C(sp3)-H bonds
Source: PubMed Central journal article supplement (PMC10789790; doi:10.1038/s41467-024-44833-y), 2024-01-15
Supplement: 41467_2024_44833_MOESM1_ESM.pdf [file 41467_2024_44833_MOESM1_ESM.pdf]

Supplementary Information for

**Photocatalytic aerobic oxidation of C(sp<sup>3</sup>)-H bonds**

Lei Zhang<sup>1†</sup>, Run-Han Li<sup>1†</sup>, Xiao-Xin Li<sup>1\*</sup>, Shengyao Wang<sup>2</sup>, Jiang Liu<sup>1</sup>, Xiao-Xuan Hong<sup>1</sup>, Long-Zhang Dong<sup>1</sup>, Shun-Li Li<sup>1</sup>, and Ya-Qian Lan<sup>1\*</sup>

<sup>1</sup>School of Chemistry, South China Normal University, Guangzhou 510631, P. R. China.

<sup>2</sup> College of Science, Huazhong Agricultural University, Wuhan, 430070, P. R. China.

†These authors contributed equally to this work.

**Corresponding Author:**

\*E-mail: [xxli@m.scnu.edu.cn](mailto:xxli@m.scnu.edu.cn); [yqlan@m.scnu.edu.cn](mailto:yqlan@m.scnu.edu.cn).

## **S1. Materials and measurements**

All starting materials, reagents and solvents used in experiments were commercially available, high-grade purity materials and used without further purification. 3,5-dibromoaniline ( $C_6H_3NH_2Br_2$ ), propanoic acid ( $C_2H_5COOH$ ), 1,6,7,12-Tetrachloroperylene Tetracarboxylic Acid Dianhydride ( $C_{24}H_4Cl_4O_6$ ), ammonium cerium nitrate ( $Ce(NH_4)_2(NO_3)_6$ ), glycine ( $NH_2CH_2COOH$ ) were purchased from Aladdin. Sodium chloride (NaCl), Benzoic acid (BA,  $C_6H_5COOH$ ), 1-naphthoic acid (NA,  $C_{10}H_7COOH$ ), 9-anthroic acid (9-AC,  $C_{14}H_9COOH$ ) were purchased from Shanghai Haohong Scientific Co. Ltd. Toluene was purchased from Guangzhou Chemical Reagent Factory. Ethylbenzene was purchased from Energy Chemical. Phenethyl ethanol, anisole sulfide, benzylamine and their derivatives were purchased from Adamas Reagent Co. Ltd.

**Supplementary Table 1.** Crystal data and structure refinement of CeBTDD (-B, -N and -A), respectively.

|                                               | CeBTDD-B                                                           | CeBTDD-N                                                           | CeBTDD-A                                                                         |
|-----------------------------------------------|--------------------------------------------------------------------|--------------------------------------------------------------------|----------------------------------------------------------------------------------|
| Empirical formula                             | C <sub>27</sub> H <sub>14</sub> CeCl <sub>2</sub> NO <sub>10</sub> | C <sub>32</sub> H <sub>16</sub> CeCl <sub>2</sub> NO <sub>10</sub> | C <sub>38</sub> H <sub>23</sub> CeCl <sub>2</sub> N <sub>2</sub> O <sub>10</sub> |
| Formula weight                                | 723.41                                                             | 785.48                                                             | 878.60                                                                           |
| Temperature/K                                 | 150                                                                | 150                                                                | 150                                                                              |
| Crystal system                                | Monoclinic                                                         | Monoclinic                                                         | Orthorhombic                                                                     |
| Space group                                   | <i>C2/c</i>                                                        | <i>C2/c</i>                                                        | <i>Pnma</i>                                                                      |
| <i>a</i> /Å                                   | 41.87(2)                                                           | 41.778(16)                                                         | 16.7769(4)                                                                       |
| <i>b</i> /Å                                   | 13.940(7)                                                          | 13.452(5)                                                          | 42.5051(9)                                                                       |
| <i>c</i> /Å                                   | 14.711(8)                                                          | 15.098(6)                                                          | 11.4038(3)                                                                       |
| $\alpha$ /°                                   | 90                                                                 | 90                                                                 | 90                                                                               |
| $\beta$ /°                                    | 104.626(16)                                                        | 99.819(13)                                                         | 90                                                                               |
| $\gamma$ /°                                   | 90                                                                 | 90                                                                 | 90                                                                               |
| Volume/Å <sup>3</sup>                         | 8308(2)                                                            | 8361(5)                                                            | 8132.1(3)                                                                        |
| <i>Z</i>                                      | 8                                                                  | 8                                                                  | 8                                                                                |
| $\rho_{\text{calc}}$ g/cm <sup>3</sup>        | 1.157                                                              | 1.248                                                              | 1.435                                                                            |
| $\mu$ /mm <sup>-1</sup>                       | 9.998                                                              | 9.978                                                              | 10.329                                                                           |
| <i>F</i> (000)                                | 2840.0                                                             | 3096                                                               | 3496.0                                                                           |
| Reflections collected                         | 10206                                                              | 16611                                                              | 40067                                                                            |
| Independent reflections                       | 3944[R <sub>int</sub> = 0.0757, R <sub>sigma</sub> = 0.0931]       | 4205[R <sub>int</sub> = 0.0718, R <sub>sigma</sub> = 0.0651]       | 8027 [R <sub>int</sub> = 0.0884, R <sub>sigma</sub> = 0.0769]                    |
| Data/restraints/parameters                    | 3944/36/372                                                        | 4205/355/463                                                       | 8027/568/688                                                                     |
| Goodness-of-fit on <i>F</i> <sup>2</sup>      | 1.082                                                              | 1.064                                                              | 1.037                                                                            |
| Final R indexes [ <i>I</i> ≥ 2σ ( <i>I</i> )] | R <sub>1</sub> = 0.0824, wR <sub>2</sub> = 0.2301                  | R <sub>1</sub> = 0.0813, wR <sub>2</sub> = 0.2182                  | R <sub>1</sub> = 0.0756, wR <sub>2</sub> = 0.2087                                |
| Final R indexes [all data]                    | R <sub>1</sub> = 0.1084, wR <sub>2</sub> = 0.2563                  | R <sub>1</sub> = 0.1038, wR <sub>2</sub> = 0.2458                  | R <sub>1</sub> = 0.1173, wR <sub>2</sub> = 0.2482                                |
| Largest diff. peak/hole / e Å <sup>-3</sup>   | 1.09/-1.99                                                         | 1.12/-1.20                                                         | 0.83/-1.32                                                                       |

$${}^a R_1 = \frac{\sum ||F_o| - |F_c||}{\sum |F_o|}, {}^b wR_2 = \frac{|\sum w (|F_o|^2 - |F_c|^2)|}{\sum w (F_o^2)^{1/2}}$$

**Supplementary Table 2.** Selected bond lengths (Å) of CeBTDD-B.

| Atom1 | Atom2           | Length/ Å | Atom1 | Atom2 | Length/ Å |
|-------|-----------------|-----------|-------|-------|-----------|
| Ce1   | O6 <sup>1</sup> | 2.478     | Ce1   | O4    | 2.561     |
| Ce1   | O6 <sup>2</sup> | 2.724     | Ce1   | O3    | 2.573     |
| Ce1   | O1              | 2.464     | Ce1   | O1w   | 2.497     |
| Ce1   | O2 <sup>3</sup> | 2.436     | Ce1   | O2w   | 2.539     |
| Ce1   | O5 <sup>2</sup> | 2.558     |       |       |           |

<sup>1</sup>+X, 1-Y, 1/2+Z, <sup>2</sup>3/2-X, -1/2+Y, 3/2-Z, <sup>3</sup>3/2-X, 1/2-Y, 1-Z.

**Supplementary Table 3.** Selected bond angles of CeBTDD-B.

| Atom1           | Atom2 | Atom3           | Angle/°  | Atom1           | Atom2 | Atom3           | Angle/°  |
|-----------------|-------|-----------------|----------|-----------------|-------|-----------------|----------|
| O6 <sup>1</sup> | Ce1   | O6 <sup>2</sup> | 72.7(4)  | O2 <sup>3</sup> | Ce1   | O3              | 138.1(4) |
| O6 <sup>1</sup> | Ce1   | O5 <sup>2</sup> | 120.2(4) | O2 <sup>3</sup> | Ce1   | O1w             | 71.6(4)  |
| O6 <sup>1</sup> | Ce1   | O4              | 133.7(5) | O2 <sup>3</sup> | Ce1   | O2w             | 72.3(5)  |
| O6 <sup>1</sup> | Ce1   | O3              | 86.9(4)  | O5 <sup>2</sup> | Ce1   | O6 <sup>2</sup> | 49.3(4)  |
| O6 <sup>1</sup> | Ce1   | O1w             | 83.1(4)  | O5 <sup>2</sup> | Ce1   | O4              | 82.3(5)  |
| O6 <sup>1</sup> | Ce1   | O2w             | 146.0(4) | O5 <sup>2</sup> | Ce1   | O3              | 129.2(4) |
| O1              | Ce1   | O6 <sup>2</sup> | 70.1(4)  | O4              | Ce1   | O6 <sup>2</sup> | 126.1(4) |
| O1              | Ce1   | O6 <sup>1</sup> | 71.7(4)  | O4              | Ce1   | O3              | 51.7(4)  |
| O1              | Ce1   | O5 <sup>2</sup> | 75.7(4)  | O3              | Ce1   | O6 <sup>2</sup> | 142.6(4) |
| O1              | Ce1   | O4              | 76.8(4)  | O1w             | Ce1   | O6 <sup>2</sup> | 136.1(4) |
| O1              | Ce1   | O3              | 74.0(4)  | O1w             | Ce1   | O5 <sup>2</sup> | 148.1(4) |
| O1              | Ce1   | O1w             | 135.5(4) | O1w             | Ce1   | O4              | 97.1(4)  |
| O1              | Ce1   | O2w             | 140.8(4) | O1w             | Ce1   | O3              | 68.6(4)  |
| O2 <sup>3</sup> | Ce1   | O6 <sup>1</sup> | 76.0(4)  | O1w             | Ce1   | O2w             | 75.6(4)  |
| O2 <sup>3</sup> | Ce1   | O6 <sup>2</sup> | 67.4(3)  | O2w             | Ce1   | O6 <sup>2</sup> | 105.2(5) |
| O2 <sup>3</sup> | Ce1   | O1              | 132.3(4) | O2w             | Ce1   | O5 <sup>2</sup> | 73.3(4)  |
| O2 <sup>3</sup> | Ce1   | O5 <sup>2</sup> | 92.0(4)  | O2w             | Ce1   | O4              | 75.9(6)  |
| O2 <sup>3</sup> | Ce1   | O4              | 147.9(4) | O2w             | Ce1   | O3              | 108.9(5) |

<sup>1</sup>+X, 1-Y, -1/2+Z, <sup>2</sup>3/2-X, -1/2+Y, 3/2-Z, <sup>3</sup>3/2-X, 1/2-Y, 1-Z

**Supplementary Table 4.** Selected bond lengths (Å) of CeBTDD-N.

| Atom1 | Atom2           | Length/ Å | Atom1 | Atom2 | Length/ Å |
|-------|-----------------|-----------|-------|-------|-----------|
| Ce1   | O6 <sup>2</sup> | 2.487     | Ce1   | O3    | 2.560     |
| Ce1   | O6 <sup>3</sup> | 2.713     | Ce1   | O4    | 2.546     |
| Ce1   | O2 <sup>1</sup> | 2.442     | Ce1   | O1w   | 2.509     |
| Ce1   | O5 <sup>3</sup> | 2.521     | Ce1   | O2w   | 2.545     |
| Ce1   | O1              | 2.435     |       |       |           |

<sup>1</sup>1/2-X, 3/2-Y, 1-Z, <sup>2</sup>+X, 1-Y, -1/2+Z, <sup>3</sup>1/2-X, 1/2+Y, 3/2-Z

**Supplementary Table 5.** Selected bond angles of CeBTDD-N.

| Atom1           | Atom2 | Atom3           | Angle/°  | Atom1           | Atom2 | Atom3           | Angle/°  |
|-----------------|-------|-----------------|----------|-----------------|-------|-----------------|----------|
| O6 <sup>1</sup> | Ce1   | O6 <sup>2</sup> | 72.7(4)  | O2 <sup>3</sup> | Ce1   | O1w             | 71.6(4)  |
| O6 <sup>1</sup> | Ce1   | O6 <sup>3</sup> | 74.3(4)  | O1              | Ce1   | O6 <sup>3</sup> | 71.1(3)  |
| O6 <sup>1</sup> | Ce1   | O5 <sup>3</sup> | 121.7(3) | O1              | Ce1   | O2 <sup>2</sup> | 133.1(3) |
| O6 <sup>1</sup> | Ce1   | O3              | 85.2(3)  | O1              | Ce1   | O5 <sup>3</sup> | 76.4(4)  |
| O6 <sup>1</sup> | Ce1   | O4              | 131.7(4) | O1              | Ce1   | O3              | 73.4(3)  |
| O6 <sup>1</sup> | Ce1   | O1w             | 83.2(4)  | O1              | Ce1   | O4              | 76.6(4)  |
| O6 <sup>1</sup> | Ce1   | O2w             | 146.4(4) | O1              | Ce1   | O1w             | 136.3(4) |
| O2 <sup>2</sup> | Ce1   | O6 <sup>1</sup> | 76.6(3)  | O1              | Ce1   | O2w             | 141.1(4) |
| O2 <sup>2</sup> | Ce1   | O6 <sup>3</sup> | 67.8(3)  | O3              | Ce1   | O6 <sup>3</sup> | 143.1(3) |
| O2 <sup>2</sup> | Ce1   | O5 <sup>3</sup> | 92.9(3)  | O4              | Ce1   | O6 <sup>3</sup> | 127.1(4) |
| O2 <sup>2</sup> | Ce1   | O3              | 136.9(3) | O4              | Ce1   | O3              | 51.0(4)  |
| O2 <sup>2</sup> | Ce1   | O4              | 148.4(4) | O1w             | Ce1   | O6 <sup>3</sup> | 135.5(3) |
| O2 <sup>2</sup> | Ce1   | O1w             | 70.0(4)  | O1w             | Ce1   | O5 <sup>3</sup> | 146.5(4) |
| O2 <sup>2</sup> | Ce1   | O2w             | 72.4(4)  | O1w             | Ce1   | O3              | 69.3(4)  |
| O5 <sup>3</sup> | Ce1   | O6 <sup>3</sup> | 49.5(3)  | O1w             | Ce1   | O4              | 96.5(4)  |
| O5 <sup>3</sup> | Ce1   | O3              | 129.4(3) | O1w             | Ce1   | O2w             | 74.4(4)  |
| O5 <sup>3</sup> | Ce1   | O4              | 83.2(4)  | O2w             | Ce1   | O6 <sup>3</sup> | 104.9(4) |
| O5 <sup>3</sup> | Ce1   | O2w             | 73.0(4)  | O2w             | Ce1   | O3              | 109.0(4) |
| O1              | Ce1   | O6 <sup>1</sup> | 71.5(3)  | O2w             | Ce1   | O4              | 76.4(5)  |

<sup>1</sup>+X, 1-Y, -1/2+Z, <sup>2</sup>1/2-X, 3/2-Y, 1-Z, <sup>3</sup>1/2-X, 1/2+Y, 3/2-Z

**Supplementary Table 6.** Selected bond lengths (Å) of CeBTDD-A.

| Atom1 | Atom2           | Length/ Å | Atom1 | Atom2           | Length/ Å |
|-------|-----------------|-----------|-------|-----------------|-----------|
| Ce1   | O9              | 2.477     | Ce1   | O7              | 2.557     |
| Ce1   | O10             | 2.581     | Ce1   | O4 <sup>3</sup> | 2.458     |
| Ce1   | O3 <sup>2</sup> | 2.467     | Ce1   | O8              | 2.499     |
| Ce1   | O6              | 2.451     | Ce1   | O11             | 2.522     |
| Ce1   | O6 <sup>1</sup> | 2.719     | Ce1   | O12             | 2.462     |

<sup>1</sup>1-X, 1-Y, 1-Z, <sup>2</sup>1/2+X, +Y, 1/2-Z, <sup>3</sup>1/2-X, 1-Y, 1/2+Z.

**Supplementary Table 7.** Selected bond angles of CeBTDD-A.

| Atom1           | Atom2 | Atom3           | Angle/°  | Atom1           | Atom2 | Atom3           | Angle/°  |
|-----------------|-------|-----------------|----------|-----------------|-------|-----------------|----------|
| O9              | Ce1   | O10             | 68.5(6)  | O7              | Ce1   | O6 <sup>1</sup> | 146.2(2) |
| O9              | Ce1   | O6 <sup>1</sup> | 137.6(4) | O4 <sup>3</sup> | Ce1   | O9              | 71.1(4)  |
| O9              | Ce1   | O7              | 74.8(4)  | O4 <sup>3</sup> | Ce1   | O10             | 74.2(6)  |
| O9              | Ce1   | O8              | 79.3(5)  | O4 <sup>3</sup> | Ce1   | O3 <sup>2</sup> | 136.2(2) |
| O10             | Ce1   | O6 <sup>1</sup> | 82.0(5)  | O4 <sup>3</sup> | Ce1   | O6 <sup>1</sup> | 72.0(2)  |
| O10             | Ce1   | O7              | 121.9(5) | O4 <sup>3</sup> | Ce1   | O7              | 126.2(3) |
| O3 <sup>2</sup> | Ce1   | O9              | 144.5(3) | O4 <sup>3</sup> | Ce1   | O8              | 148.8(2) |
| O3 <sup>2</sup> | Ce1   | O10             | 133.3(4) | O4 <sup>3</sup> | Ce1   | O11             | 68.7(5)  |
| O3 <sup>2</sup> | Ce1   | O6 <sup>1</sup> | 76.2(2)  | O4 <sup>3</sup> | Ce1   | O12             | 78.2(6)  |
| O3 <sup>2</sup> | Ce1   | O7              | 72.2(2)  | O8              | Ce1   | O10             | 86.3(6)  |
| O3 <sup>2</sup> | Ce1   | O8              | 75.0(2)  | O8              | Ce1   | O6 <sup>1</sup> | 129.8(2) |
| O3 <sup>2</sup> | Ce1   | O11             | 134.6(6) | O8              | Ce1   | O7              | 50.9(2)  |
| O6              | Ce1   | O9              | 109.8(5) | O8              | Ce1   | O11             | 87.3(6)  |
| O6              | Ce1   | O10             | 144.9(6) | O11             | Ce1   | O6 <sup>1</sup> | 140.7(5) |
| O6              | Ce1   | O3 <sup>2</sup> | 71.9(2)  | O11             | Ce1   | O7              | 64.4(5)  |
| O6              | Ce1   | O6 <sup>1</sup> | 77.6(2)  | O12             | Ce1   | O3 <sup>2</sup> | 139.0(6) |
| O6              | Ce1   | O7              | 81.8(2)  | O12             | Ce1   | O6 <sup>1</sup> | 103.3(7) |
| O6              | Ce1   | O4 <sup>3</sup> | 72.5(3)  | O12             | Ce1   | O7              | 108.2(7) |
| O6              | Ce1   | O8              | 128.6(2) | O12             | Ce1   | O8              | 75.1(7)  |
| O6              | Ce1   | O11             | 89.0(6)  | O12             | Ce1   | O11             | 70.4(8)  |
| O6              | Ce1   | O12             | 148.8(6) |                 |       |                 |          |

<sup>1</sup>1-X,1-Y,1-Z, <sup>2</sup>1/2+X,+Y,1/2-Z, <sup>3</sup>1/2-X,1-Y,1/2+Z

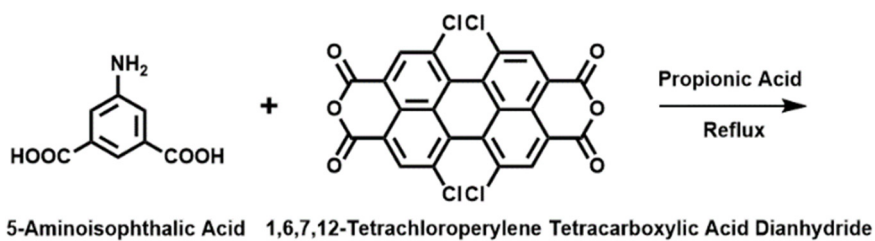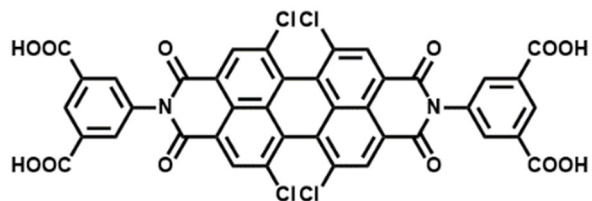

N,N-Bis(3,5-dicarboxyl)-1,6,7,12-Tetrachloroperylene-3,4,9,10-Tetracarboxylic Diimide

Supplementary Figure 1. The synthetic route of H<sub>4</sub>BTDD.

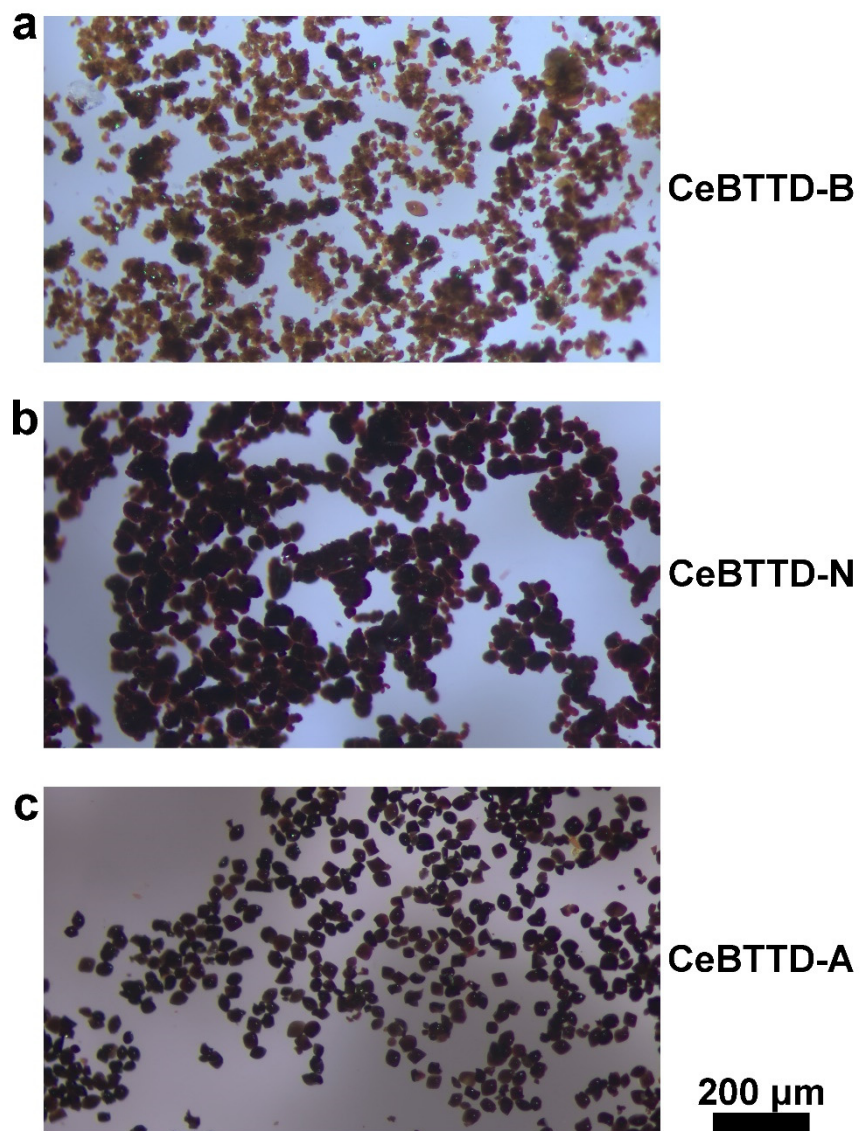

**Supplementary Figure 2.** The photograph of **a** CeBTDD-B, **b** CeBTDD-N and **c** CeBTDD-A under an optical microscope.



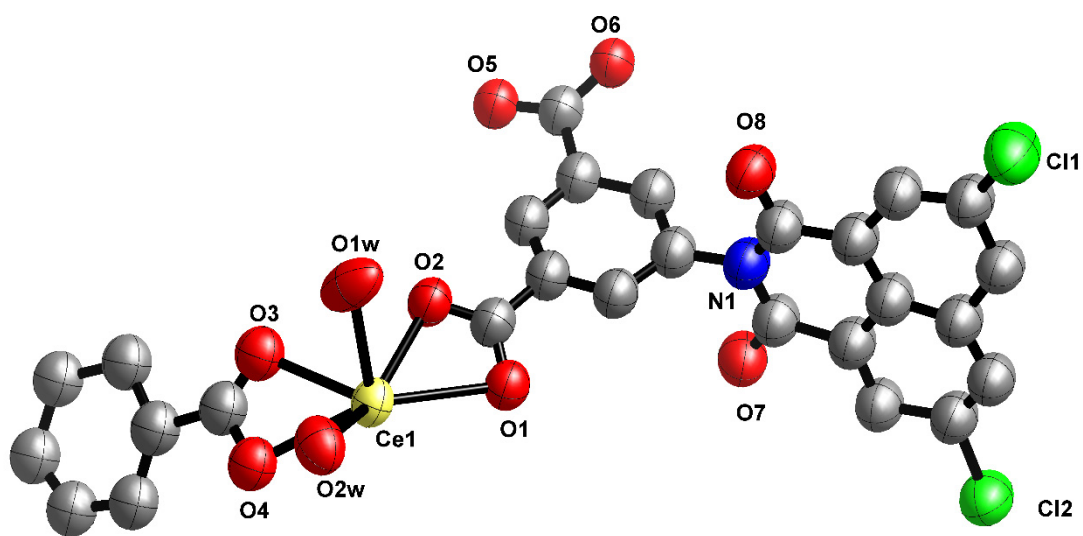

**Supplementary Figure 3.** Asymmetric unit in the single-crystal structure of CeBTDD-B. Thermal ellipsoids are drawn with 50% probability. All hydrogen atoms are omitted for clarity. Ce, yellow, Cl, green, O, red, C, gray, N, blue.

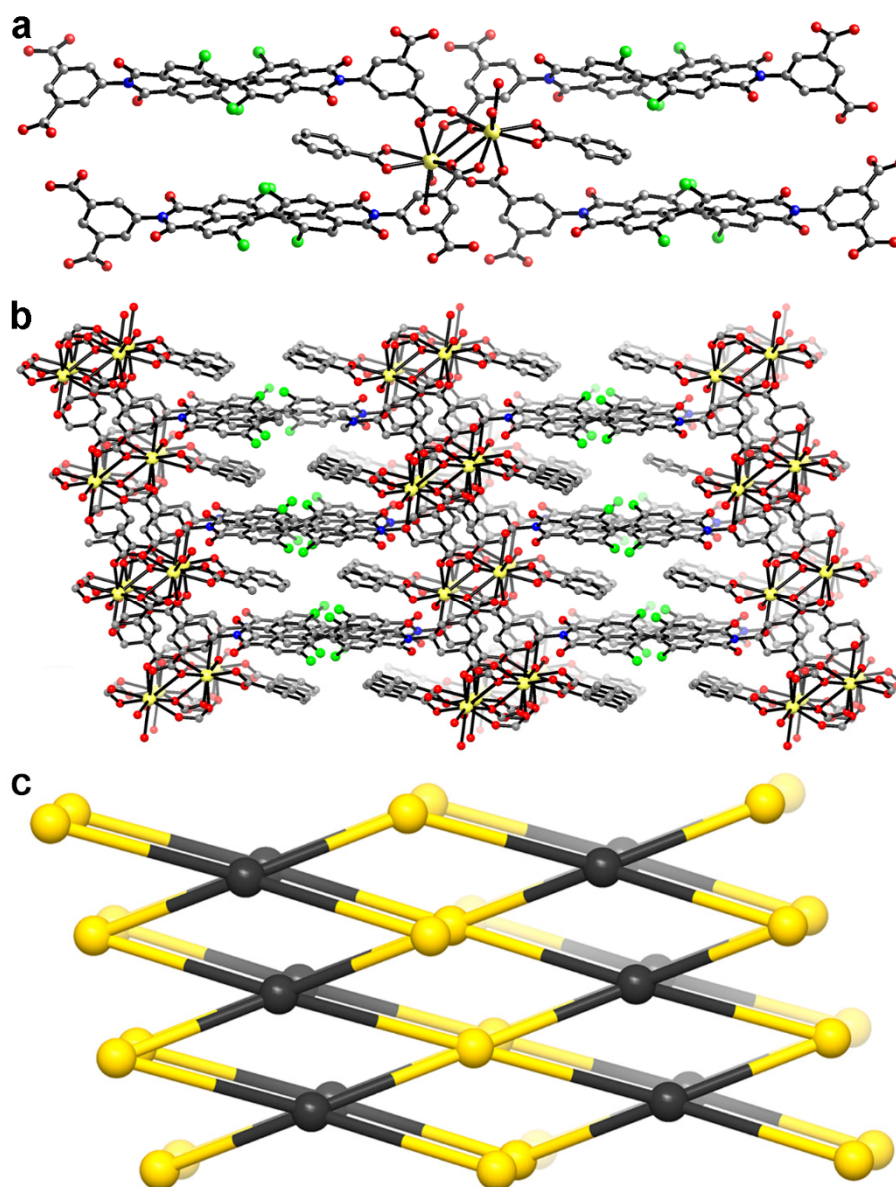

**Supplementary Figure 4.** **a** The coordination environment of Ce<sub>2</sub> in CeBTDD-B. Each Ce<sub>2</sub> in CeBTDD-B was coordination with four BTDD<sup>4+</sup>, two BA<sup>-</sup> and two coordinated water molecules. All hydrogen atoms are omitted for clarity. Ce, yellow, Cl, green, O, red, C, gray, N, blue. **b** The three-dimensional structural and **c** the corresponding topology diagrams of CeBTDD-B, which the yellow balls represent {Ce<sub>2</sub>} and black balls represent BTDD<sup>4+</sup>, respectively.

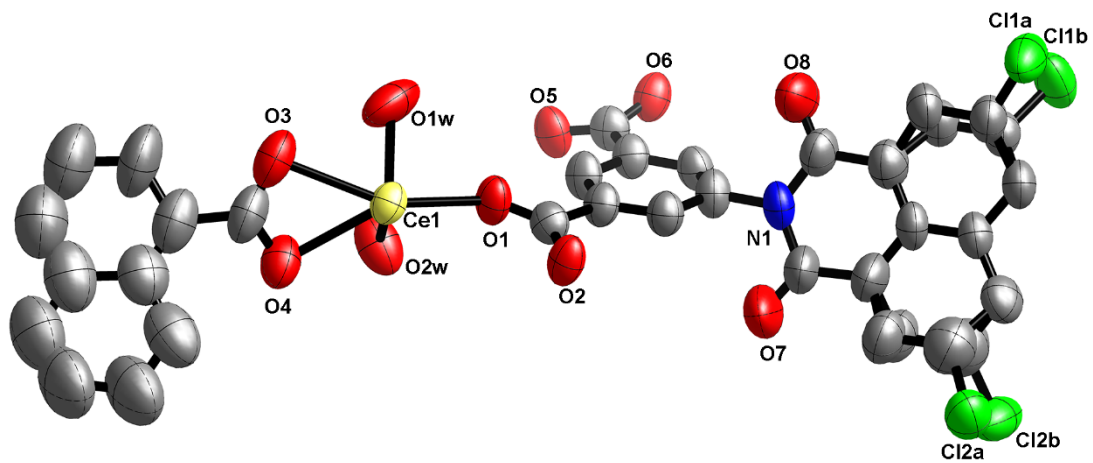

**Supplementary Figure 5.** Asymmetric unit in the single-crystal structure of CeBTTD-N with the disordered ligands. Thermal ellipsoids are drawn with 50% probability. All hydrogen atoms are omitted for clarity. Ce, yellow, Cl, green, O, red, C, gray, N, blue.

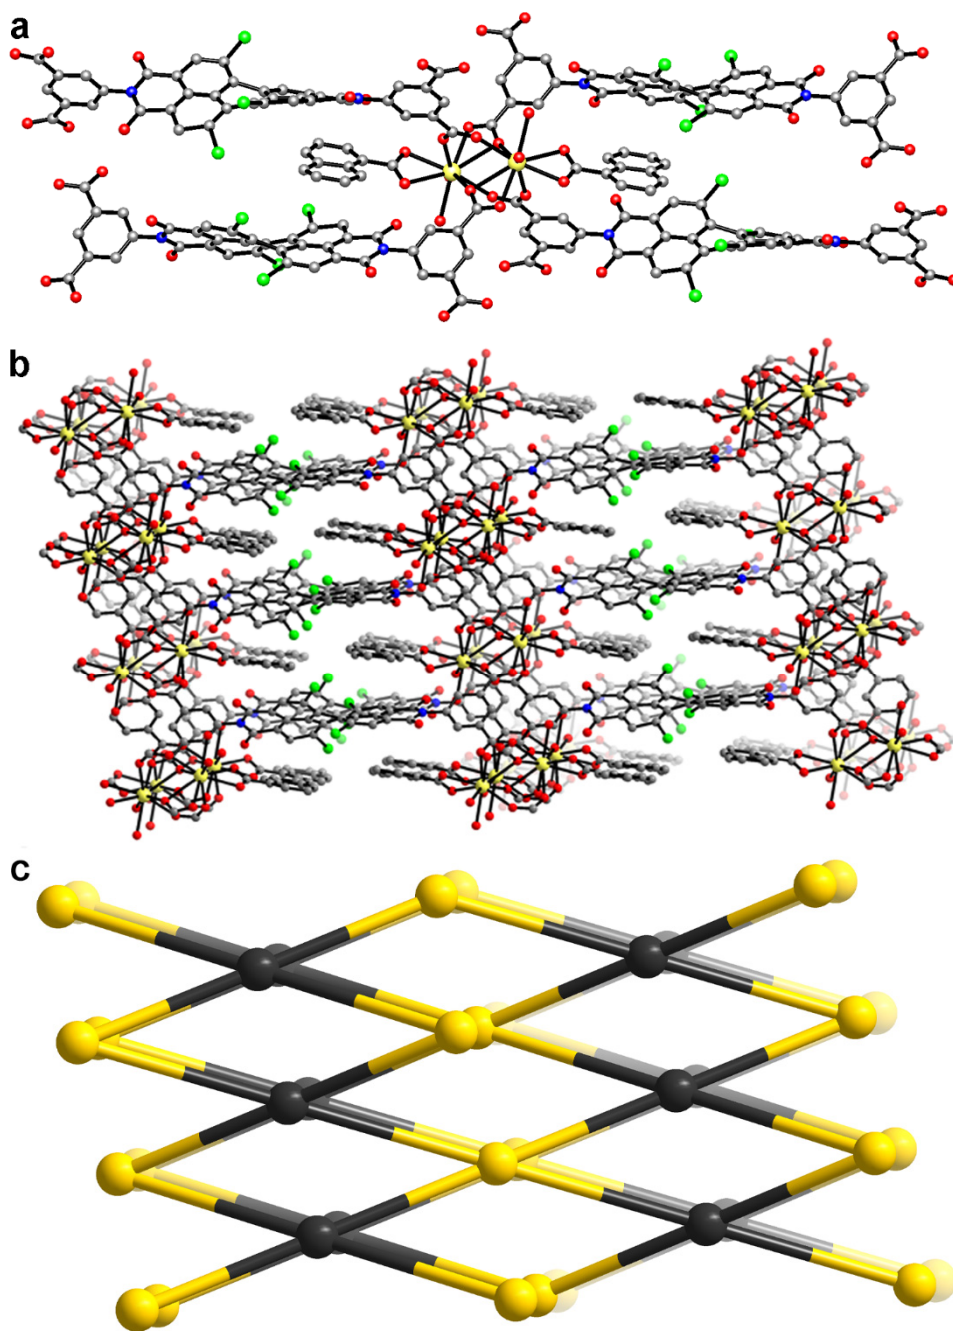

**Supplementary Figure 6.** **a** The coordination environment of Ce<sub>2</sub> in CeBTDD-N. Each Ce<sub>2</sub> in CeBTDD-N was coordination with four BTDD<sup>4+</sup>, two NA<sup>-</sup> and two coordinated water molecules. All hydrogen atoms are omitted for clarity. Ce, yellow, Cl, green, O, red, C, gray, N, blue. **b** The three-dimensional structural and **c** the corresponding topology diagrams of CeBTDD-N, which the yellow balls represent {Ce<sub>2</sub>} and black balls represent BTDD<sup>4+</sup>, respectively.

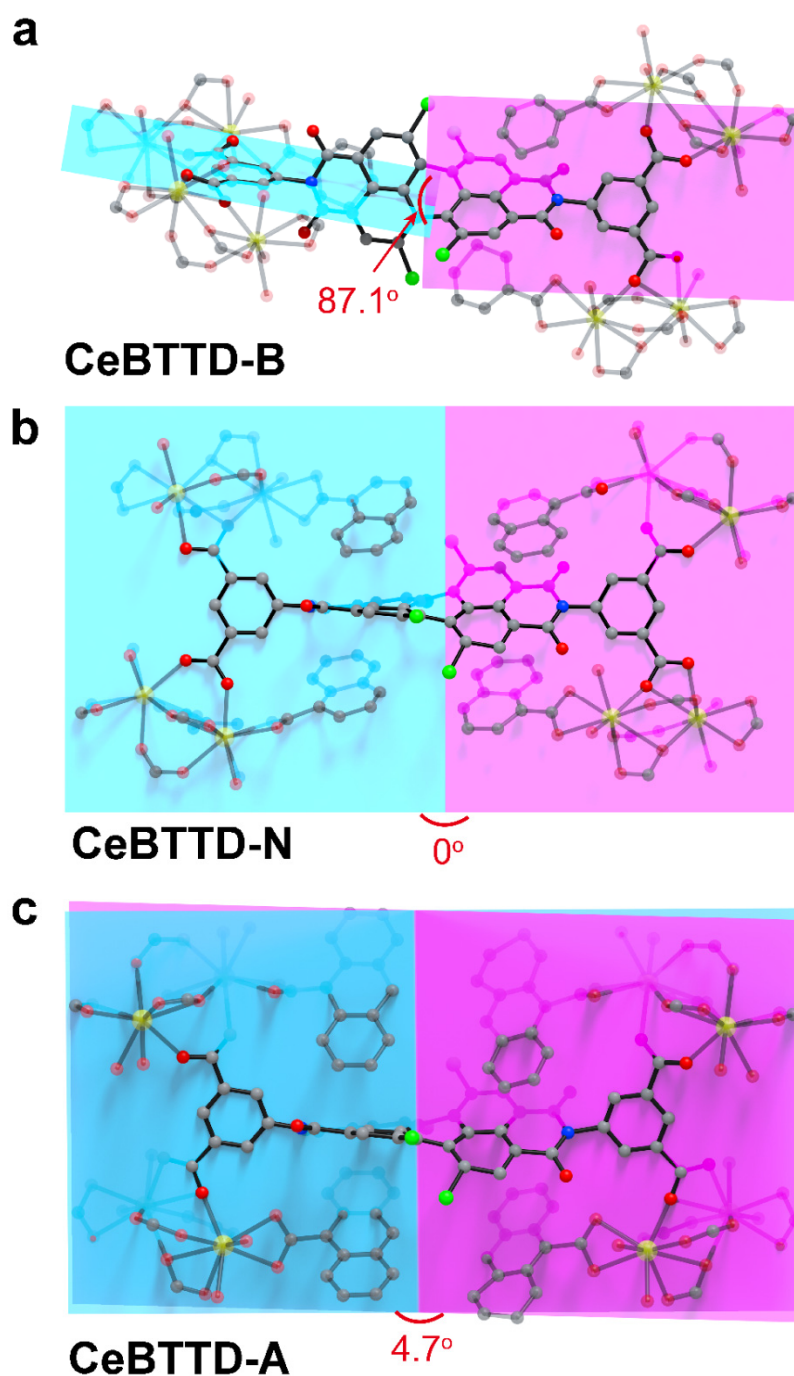

**Supplementary Figure 7.** The dihedral angle between two benzene rings in  $\text{BTTD}^{4+}$  ligand in CeBTTD HMMJs. **a** The planes of the two benzene rings in  $\text{BTTD}^{4+}$  of CeBTTD-B are almost perpendicular, and the dihedral angle is calculated to be 87.1 degree. **b** The planes of the two benzene rings in  $\text{BTTD}^{4+}$  of CeBTTD-N are completely coincident, and the dihedral angle is 0 degree. **c** There is only a very small angle between the two planes of the benzene rings in  $\text{BTTD}^{4+}$  of CeBTTD-A and the dihedral angle is calculated to be 4.7 degrees. All hydrogen atoms are omitted for clarity.

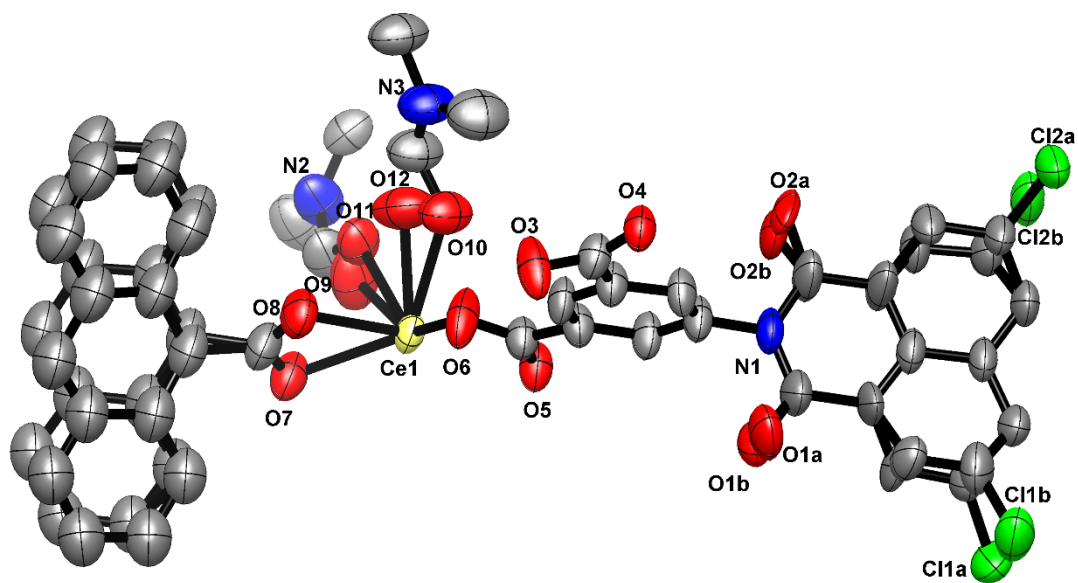

**Supplementary Figure 8.** Asymmetric unit in the single-crystal structure of CeBTTD-A with the disordered ligands and solvent molecules. Thermal ellipsoids are drawn with 50% probability. All hydrogen atoms are omitted for clarity. Ce, yellow, Cl, green, O, red, C, gray, N, blue.

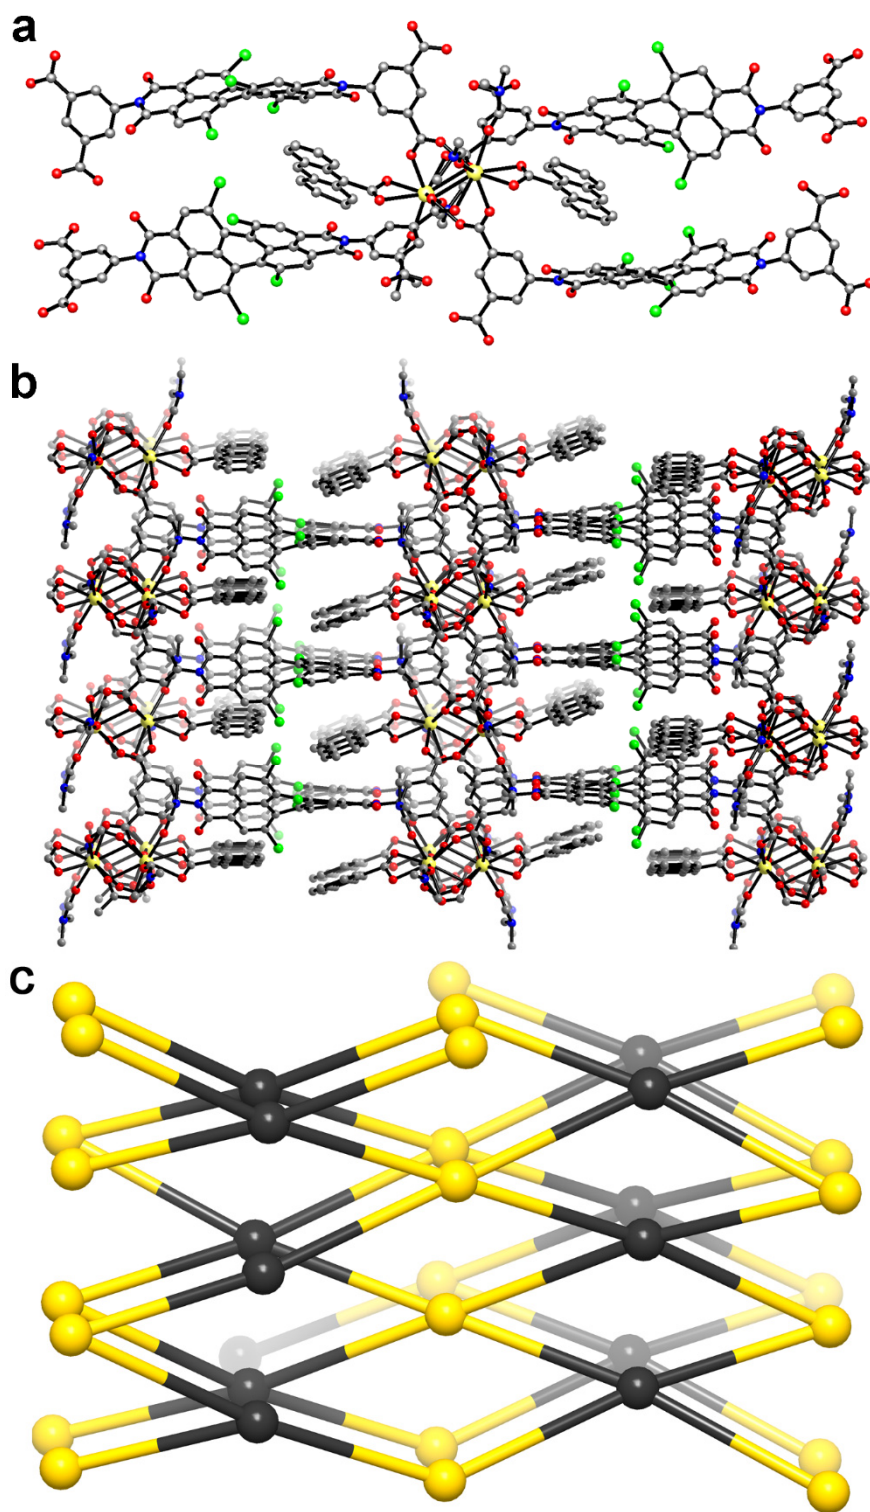

**Supplementary Figure 9.** **a** The coordination environment of Ce<sub>2</sub> in CeBTTD-A. All hydrogen atoms are omitted for clarity. Ce, yellow, Cl, green, O, red, C, gray, N, blue. **b** The three-dimensional structural and **c** the corresponding topology diagrams of CeBTTD-A, which the yellow balls represent {Ce<sub>2</sub>} and black balls represent BTDD<sup>4-</sup>, respectively.

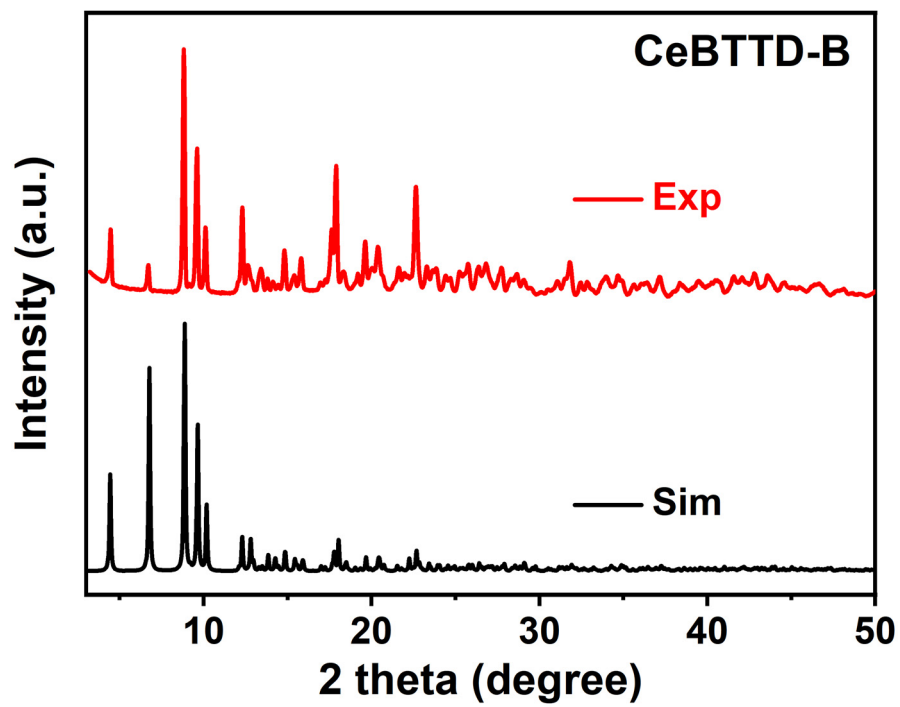

**Supplementary Figure 10.** The experimental (red) and simulated (black) PXRD patterns of CeBTDD-B.



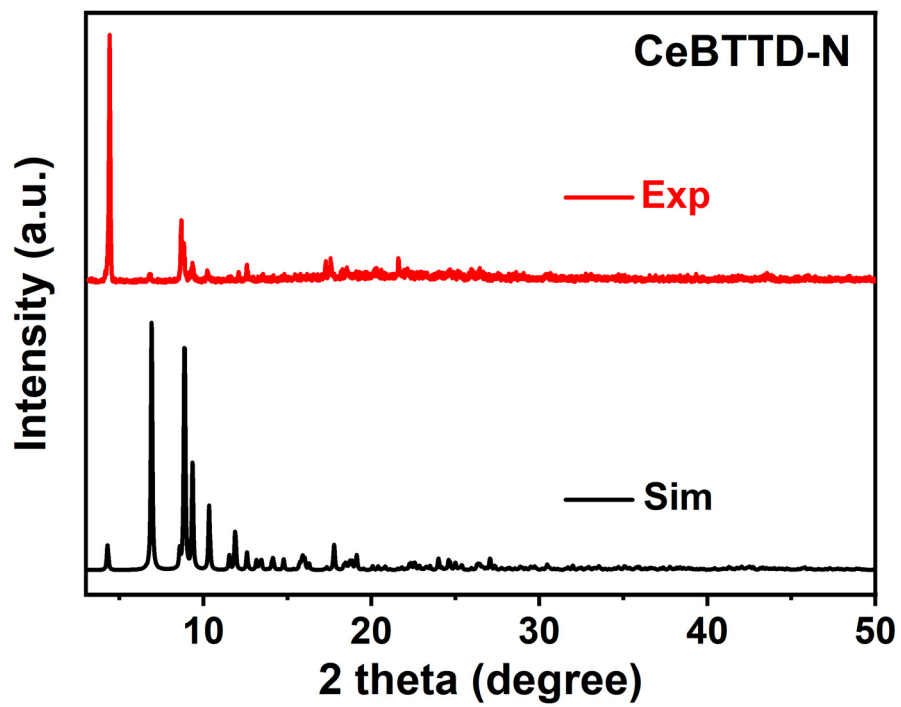

Supplementary Figure 11. The experimental (red) and simulated (black) PXR D patterns of CeBT TD-N.

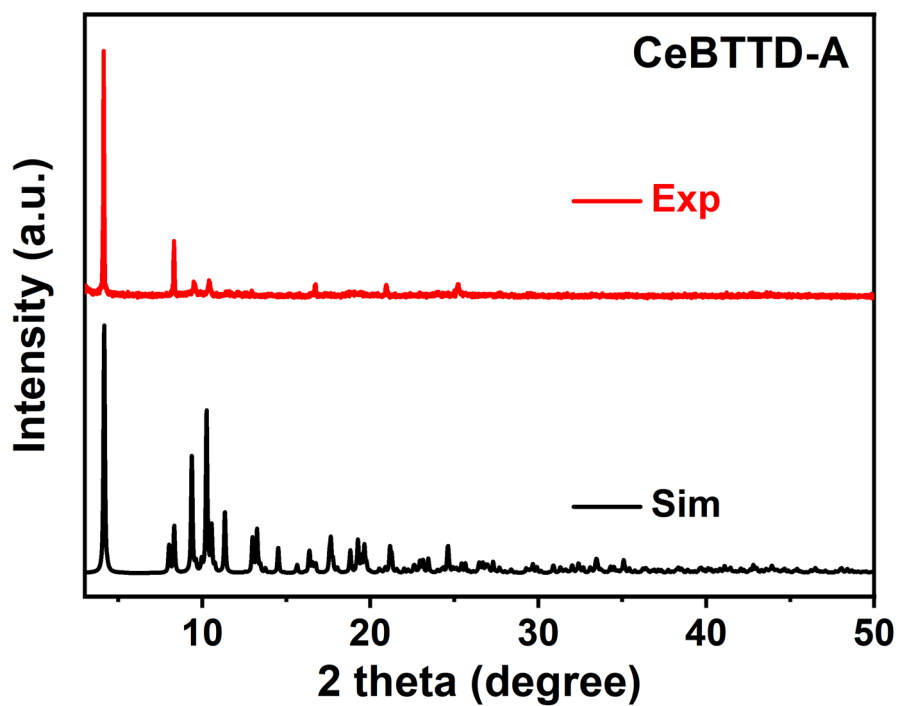

**Supplementary Figure 12.** The experimental (red) and simulated (black) PXRD patterns of CeBTDD-A.

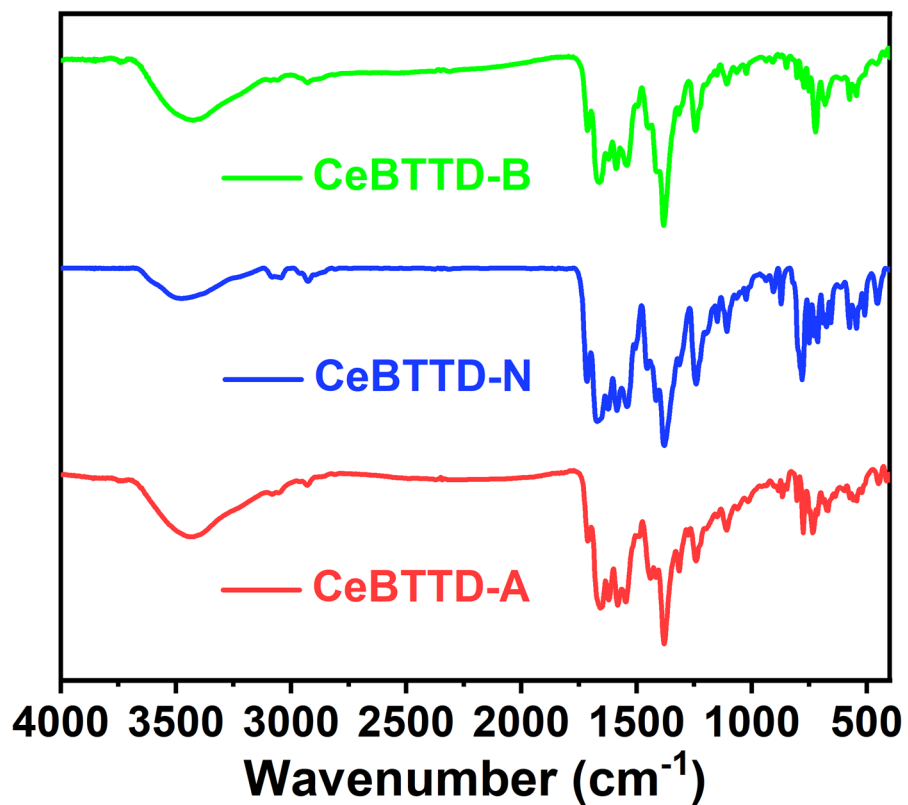

**Supplementary Figure 13.** The FTIR spectra of CeBTDD-B (green), CeBTDD-N (blue) and CeBTDD-A (red), respectively.

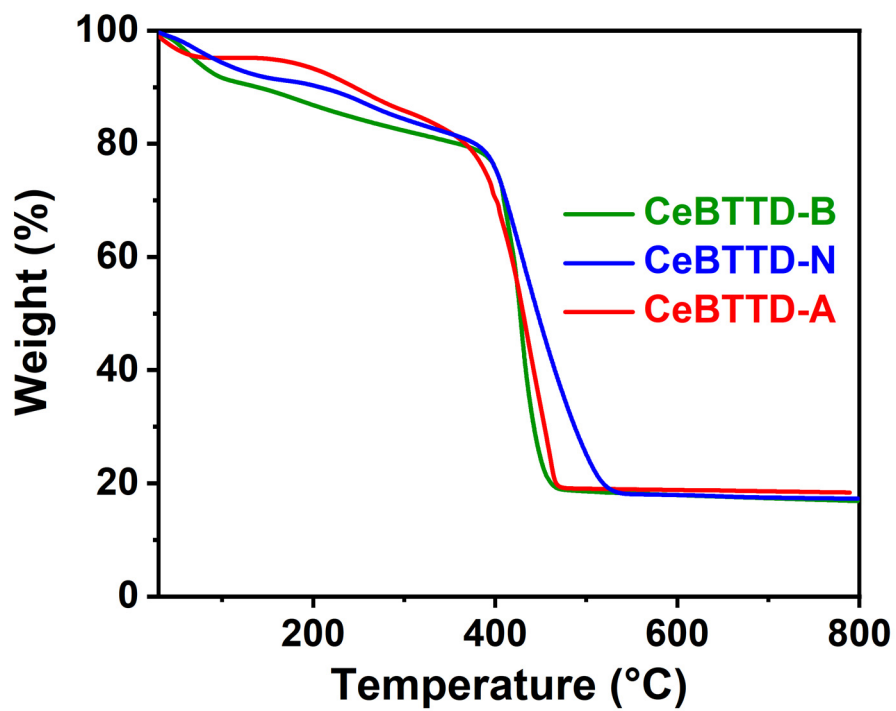

**Supplementary Figure 14.** The TGA curves of CeBTDD-B (green), CeBTDD-N (blue) and CeBTDD-A (red), respectively.

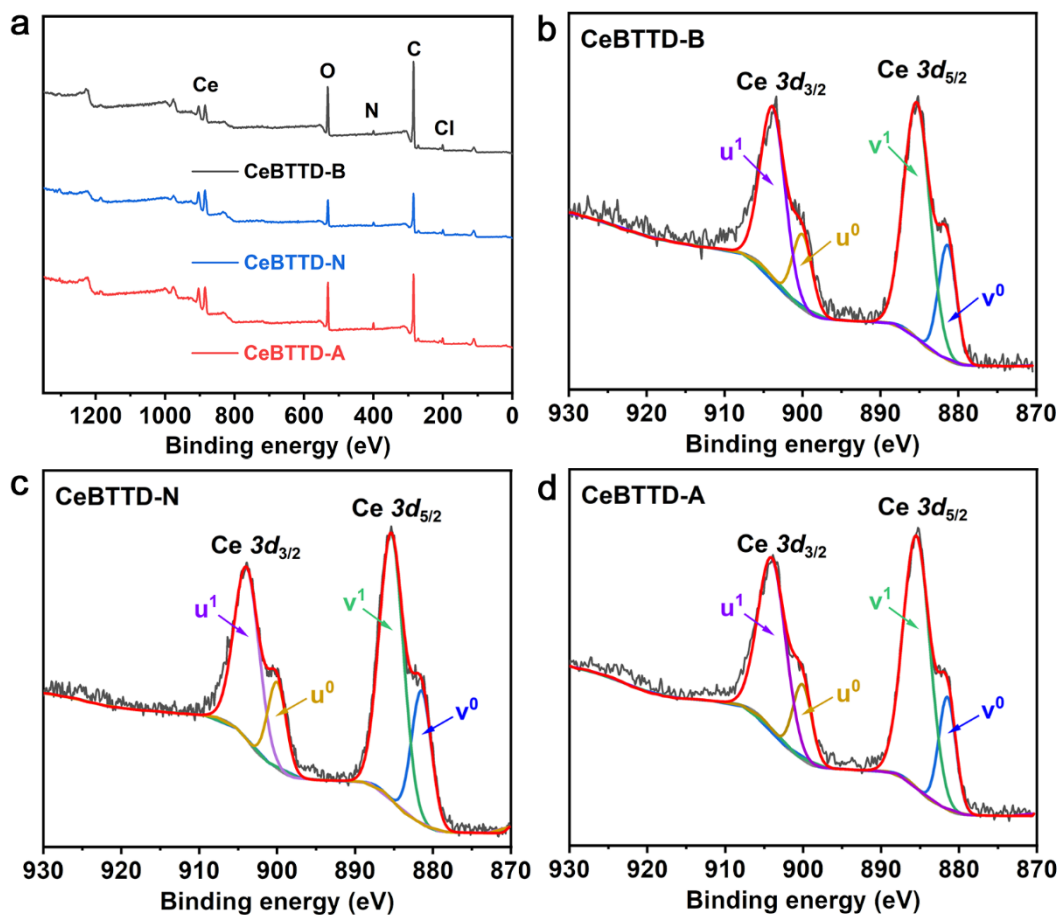

**Supplementary Figure 15.** a XPS survey spectra and High-resolution peaks of Ce 3d spectrum of b CeBTTD-B, c CeBTTD-N and d CeBTTD-A, respectively. There is no satellite peak located around 916.0 eV, which suggest that Ce ions in CeBTTD HMMJs are all in +3 oxidation state.<sup>1</sup>

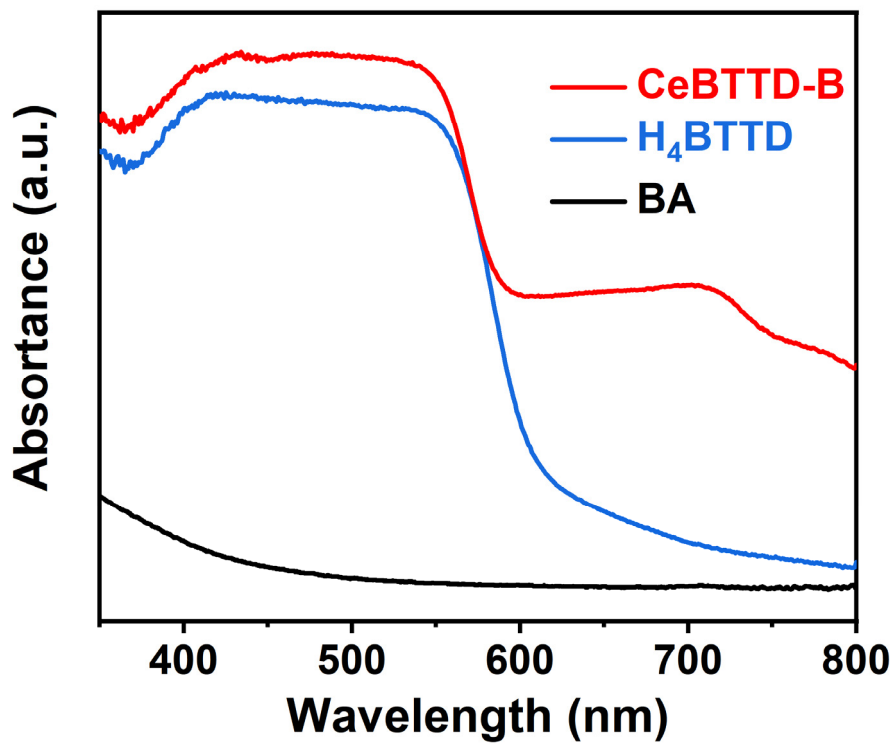

**Supplementary Figure 16.** UV-Visible diffuse reflection spectra for CeBTDD-B and its motifs (BA and H<sub>4</sub>BTDD).

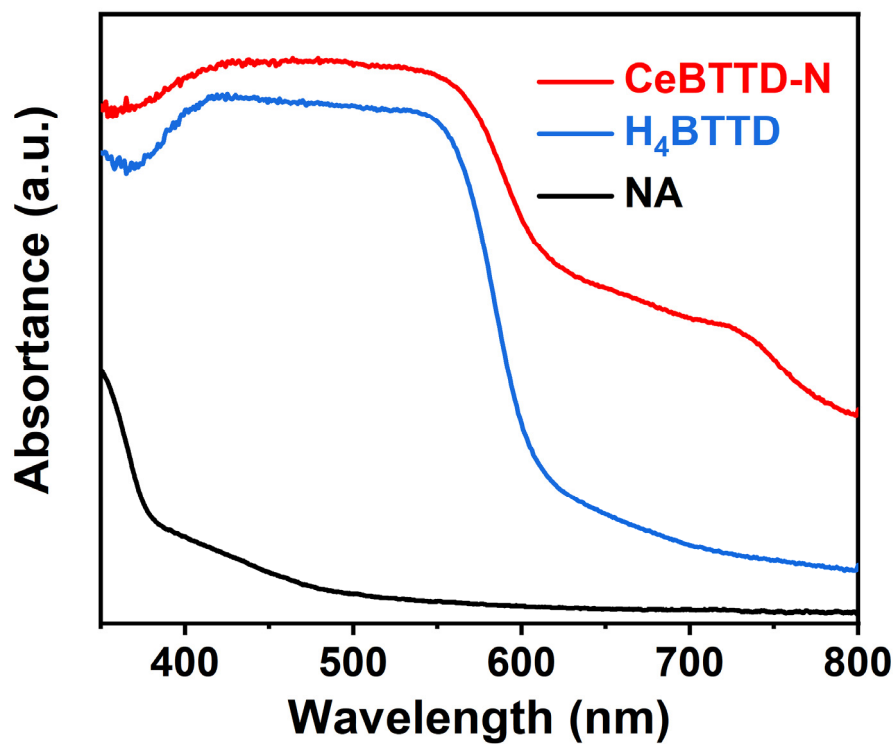

**Supplementary Figure 17.** UV-Visible diffuse reflection spectra for CeBTDD-N and its motifs (NA and H<sub>4</sub>BTDD).

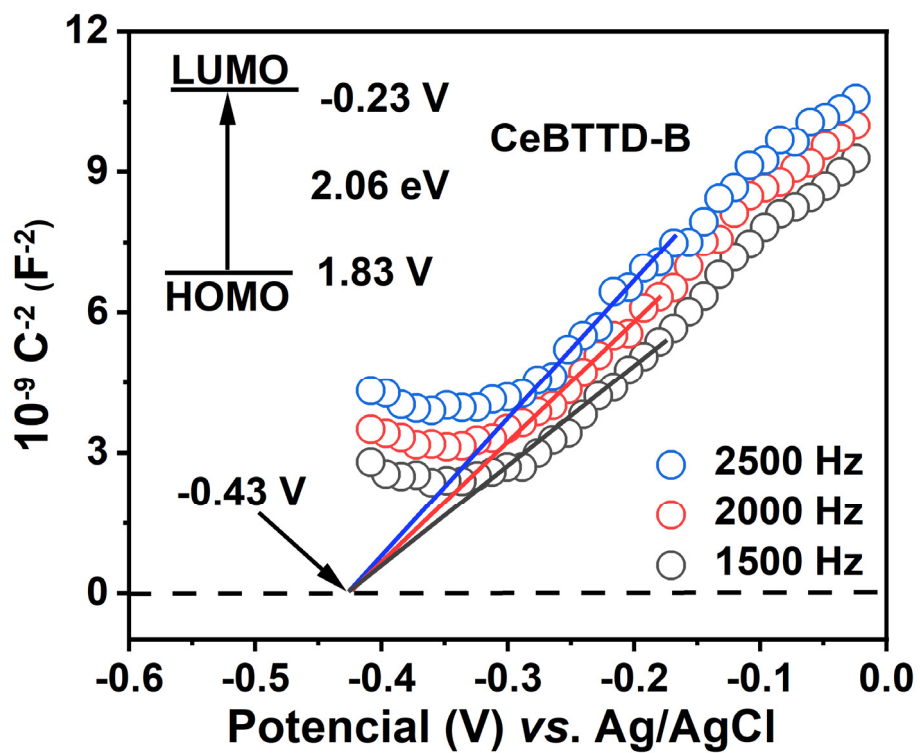

**Supplementary Figure 18.** Mott-Schottky plot measurement for CeBTDD-B. Inset: Energy diagram of the HOMO and LUMO levels of CeBTDD-B.



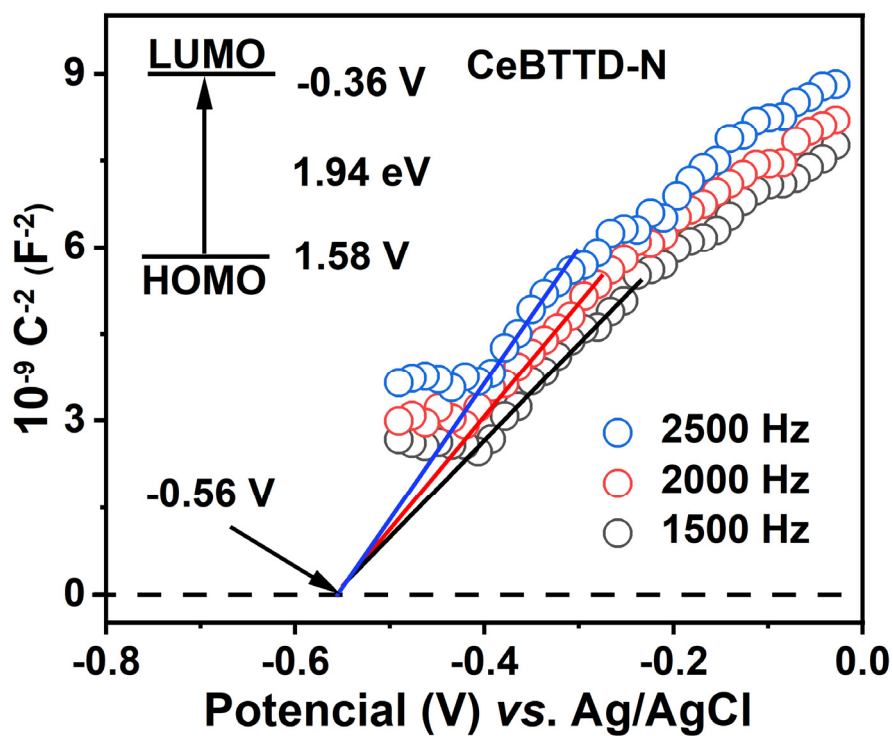

**Supplementary Figure 19.** Mott-Schottky plot measurement for CeBTDD-N. Inset: Energy diagram of the HOMO and LUMO levels of CeBTDD-N.

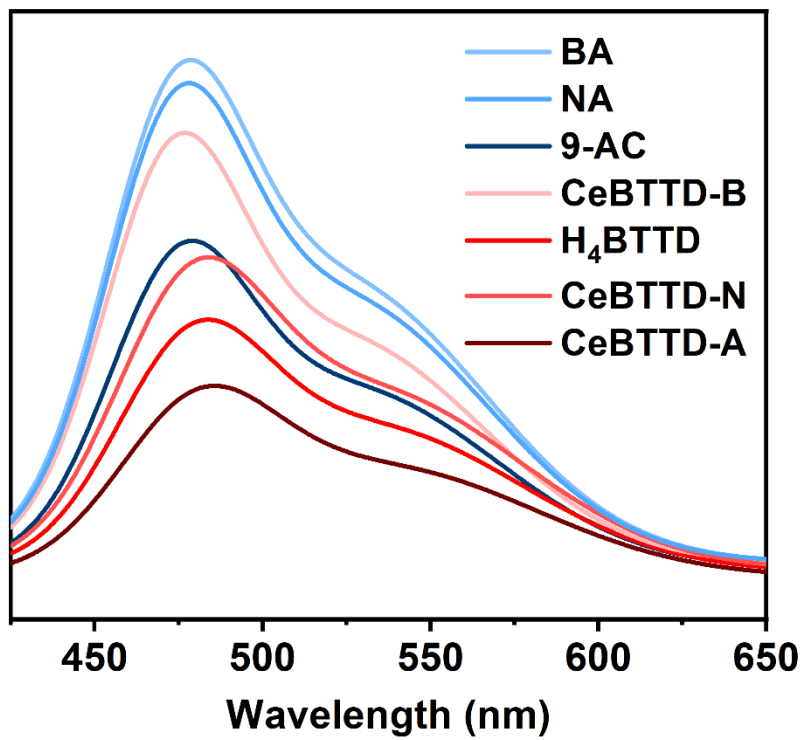

**Supplementary Figure 20.** Photoluminescence (PL) emission spectra of CeBTTD HMMJs and ligands under excitation at 400 nm.

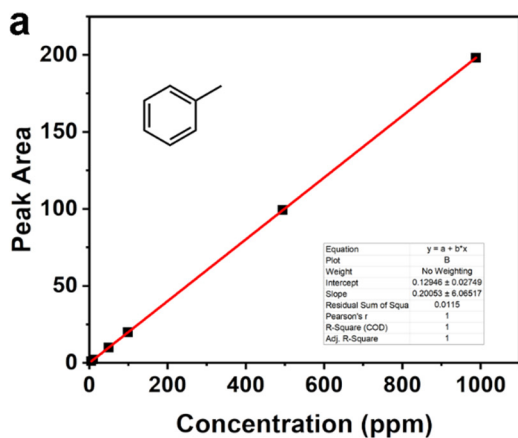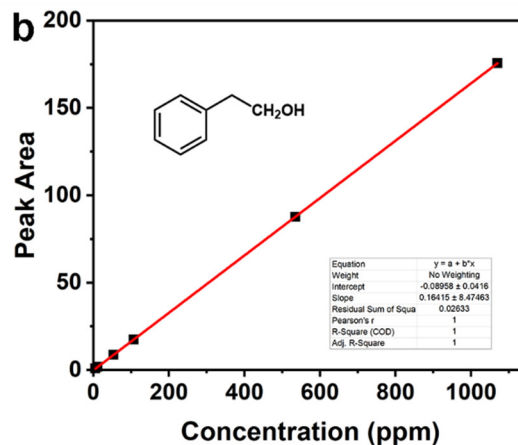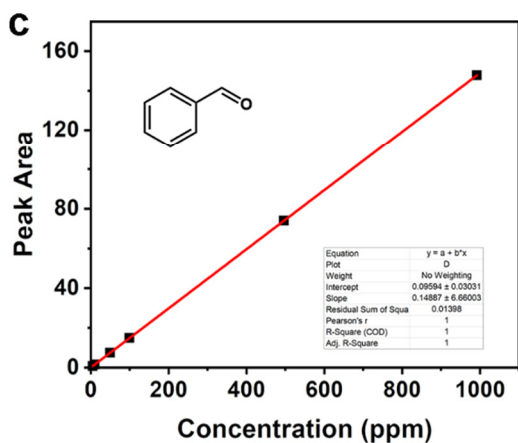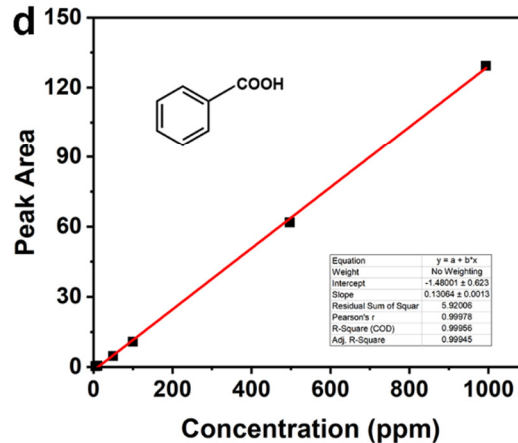

Supplementary Figure 21. Standard curves of **a** toluene, **b** benzyl alcohol, **c** benzaldehyde and **d** benzoic acid by GC analysis.

**Supplementary Table 8.** The photocatalytic performance of toluene oxidation with different photocatalysts.

| Entry | Photocatalyst                                                          | Reaction Condition                    | Conversion (%) |
|-------|------------------------------------------------------------------------|---------------------------------------|----------------|
| 1     | CeBTDD-A                                                               | normal                                | 99             |
| 2     | CeBTDD-N                                                               | normal                                | trace          |
| 3     | CeBTDD-B                                                               | normal                                | trace          |
| 4     | CeBTDD-A                                                               | no substrate                          | trace          |
| 5     | CeBTDD-A                                                               | N <sub>2</sub> replace O <sub>2</sub> | trace          |
| 6     | no catalyst                                                            | normal                                | trace          |
| 7     | CeBTDD-A                                                               | dark                                  | trace          |
| 8     | 9-AC (homogeneous photocatalyst)                                       | normal                                | 48             |
| 9     | H <sub>4</sub> BTDD                                                    | normal                                | trace          |
| 10    | H <sub>4</sub> BTDD : 9-AC<br>(2 mg : 1 mg)                            | normal                                | 70             |
| 11    | H <sub>4</sub> BTDD : 9-AC : CeCl <sub>3</sub><br>(2 mg : 1 mg : 2 mg) | normal                                | 72             |

Normal condition: 5 mg photocatalyst, 0.1 mmol substrate, 24 hours, 3 mL CH<sub>3</sub>CN as the reagent, 300 W xenon light irradiation (300-1100 nm), 1 atm O<sub>2</sub>.

**Supplementary Table 9.** Photocatalytic performance of oxidation of toluene derivatives with CeBTDD-A as the photocatalyst.

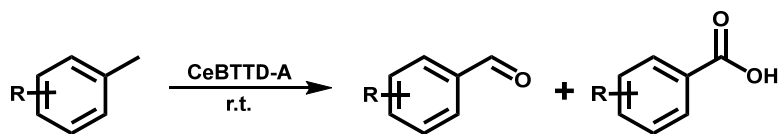

| R                          | Atmosphere     | Yield (%) |           | Conversion (%) |
|----------------------------|----------------|-----------|-----------|----------------|
|                            |                | R-ph-CHO  | R-ph-COOH |                |
| <i>p</i> -H                | O <sub>2</sub> | trace     | 98        | 98             |
|                            | Air            | 2         | 93        | 95             |
| <i>p</i> -OCH <sub>3</sub> | O <sub>2</sub> | trace     | 99        | 99             |
|                            | Air            | trace     | 97        | 97             |
| <i>p</i> -CN               | O <sub>2</sub> | 10        | 62        | 72             |
|                            | Air            | 7         | 50        | 57             |
| <i>p</i> -F                | O <sub>2</sub> | trace     | 98        | 98             |
|                            | Air            | 2         | 96        | 98             |
| <i>p</i> -Cl               | O <sub>2</sub> | 3         | 95        | 98             |
|                            | Air            | 19        | 66        | 85             |
| <i>p</i> -Br               | O <sub>2</sub> | 13        | 76        | 89             |
|                            | Air            | 22        | 53        | 75             |
| <i>o</i> -Br               | O <sub>2</sub> | 22        | 55        | 77             |
|                            | Air            | 10        | 45        | 55             |
| <b>COOH-ph-COOH</b>        |                |           |           |                |
| <i>p</i> -CH <sub>3</sub>  | O <sub>2</sub> | trace     | trace     | 74             |
|                            | Air            | trace     | trace     | 53             |

Condition: 5 mg photocatalyst, 0.1 mmol substrate, 24 hours, 3 mL CH<sub>3</sub>CN as the reagent, 300 W xenon light irradiation (300-1100 nm).

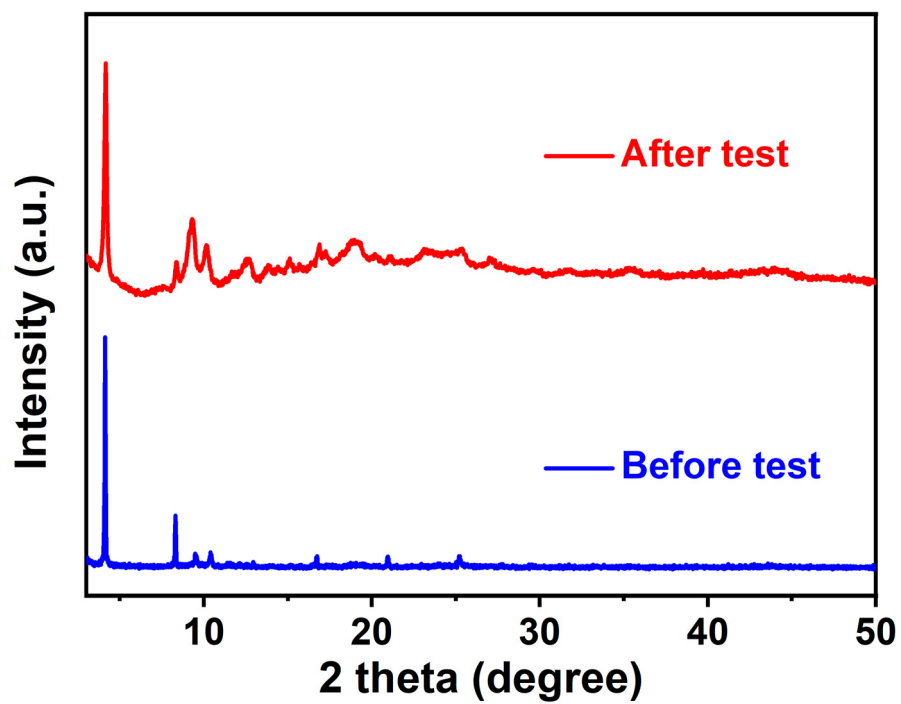

**Supplementary Figure 22.** The PXRD pattern of CeBTDD-A before (blue) and after (red) the photocatalytic tests.

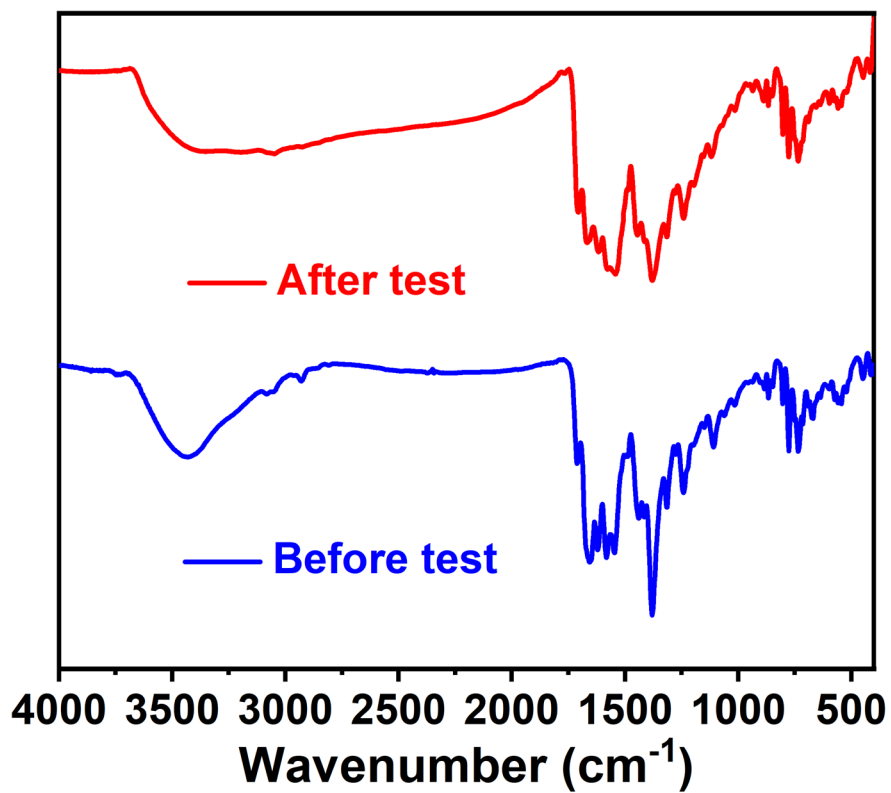

**Supplementary Figure 23.** The FTIR spectra for CeBTDD-A before (blue) and after (red) the photocatalytic tests.

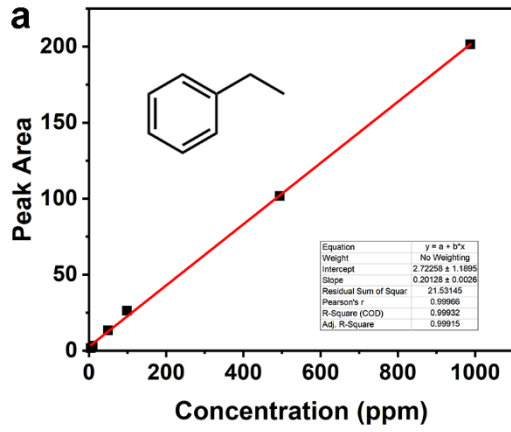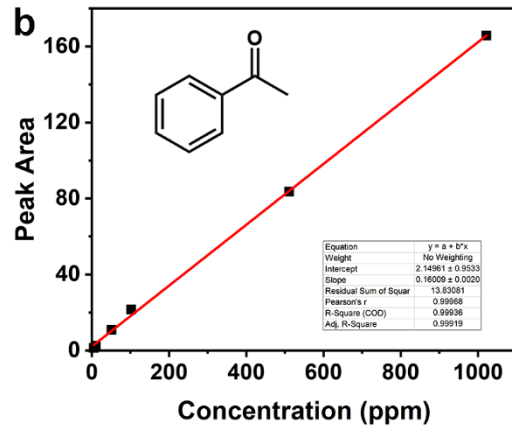

Supplementary Figure 24. Standard curves of **a** ethylbenzene and **b** acetophenone by GC analysis.



**Supplementary Table 10.** The photocatalytic performance of ethylbenzene oxidation with different photocatalysts.

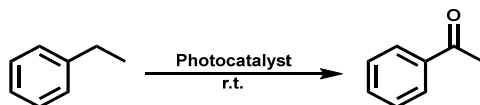

| Entry | Photocatalyst                                                          | Reaction Condition                    | Conversion (%) |
|-------|------------------------------------------------------------------------|---------------------------------------|----------------|
| 1     | CeBTDD-A                                                               | normal                                | 99             |
| 2     | CeBTDD-N                                                               | normal                                | 1              |
| 3     | CeBTDD-B                                                               | normal                                | trace          |
| 4     | CeBTDD-A                                                               | no substrate                          | trace          |
| 5     | CeBTDD-A                                                               | N <sub>2</sub> replace O <sub>2</sub> | trace          |
| 6     | no catalyst                                                            | normal                                | trace          |
| 7     | CeBTDD-A                                                               | dark                                  | trace          |
| 8     | 9-AC (homogeneous photocatalyst)                                       | normal                                | 35             |
| 9     | H <sub>4</sub> BTDD                                                    | normal                                | trace          |
| 10    | H <sub>4</sub> BTDD : 9-AC<br>(2 mg : 1 mg)                            | normal                                | 65             |
| 11    | H <sub>4</sub> BTDD : 9-AC : CeCl <sub>3</sub><br>(2 mg : 1 mg : 2 mg) | normal                                | 63             |

Normal condition: 5 mg photocatalyst, 0.1 mmol substrate, 12 hours, 3 mL CH<sub>3</sub>CN as the reagent, 300 W xenon light irradiation (300-1100 nm), 1 atm O<sub>2</sub>.

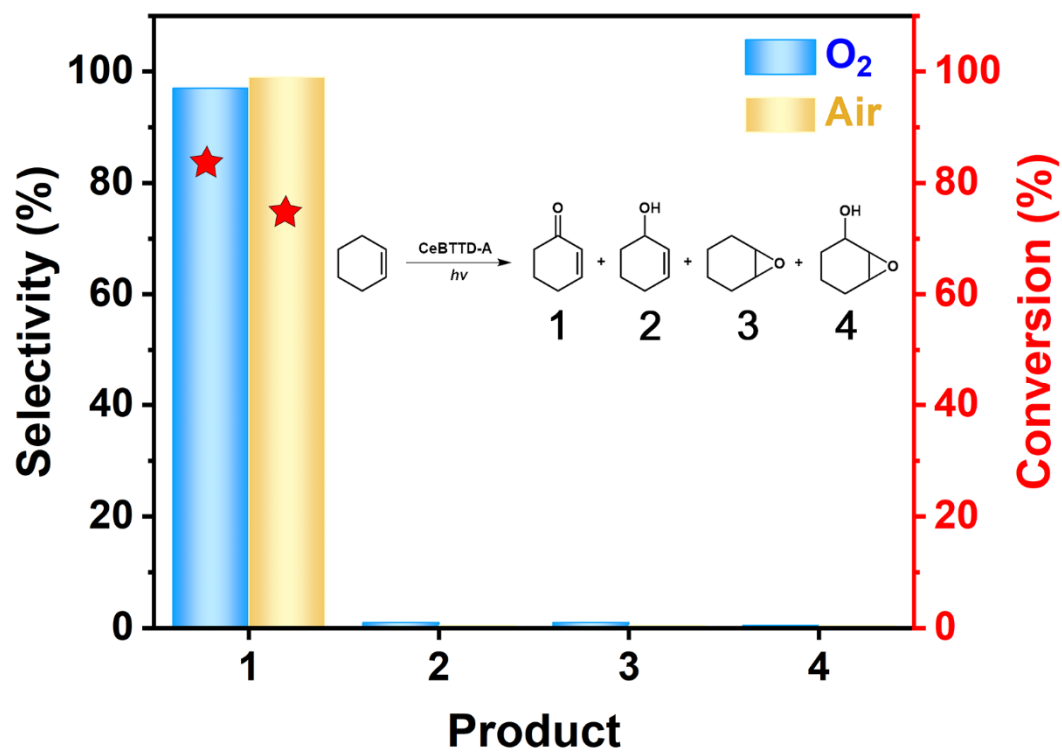

**Supplementary Figure 25.** Photocatalytic performance for aerobic oxidation of cyclohexene. Reaction condition: 0.1 mmol substrates, 5 mg CeBTDD-A as the photocatalyst, air or O<sub>2</sub> as reaction atmosphere, 24 hours, 3 mL CH<sub>3</sub>CN as the reagent, 300-1100 nm xenon light source.

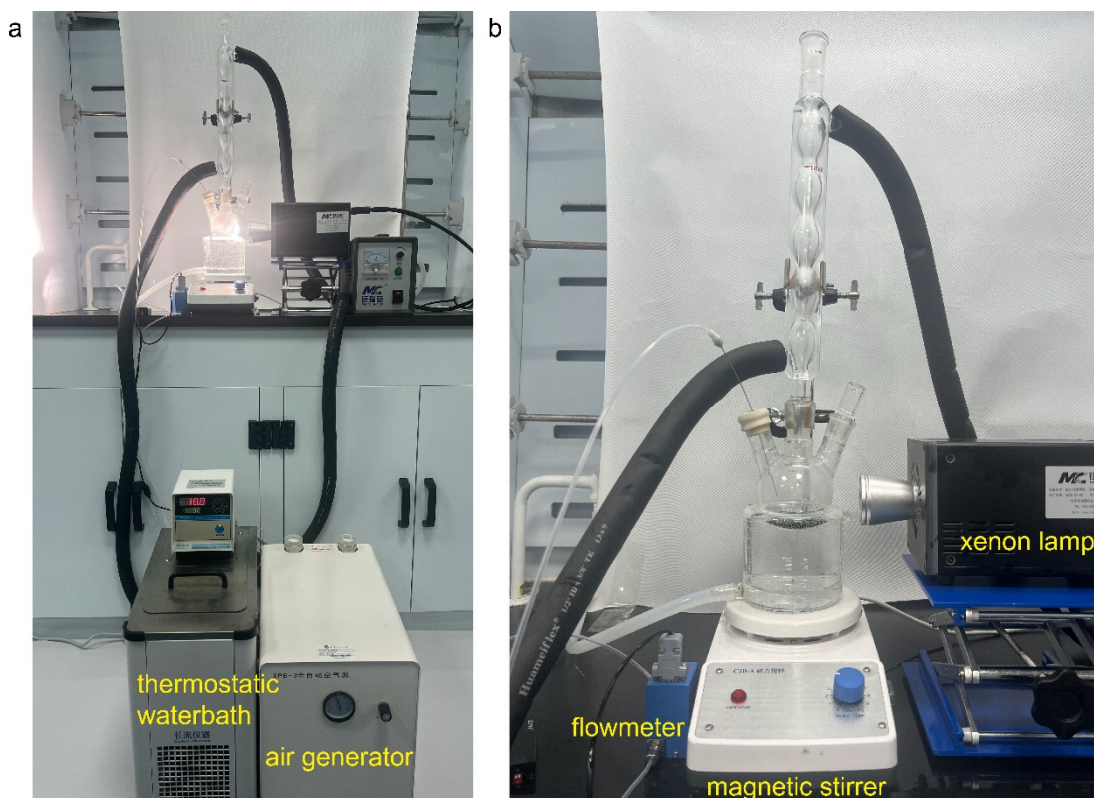

**Supplementary Figure 26.** **a** The reaction equipment and **b** the illumination equipment for the solvent-free ten-gram-scale reaction of ethylbenzene oxidation. The photocatalytic experiment was carried out on a 300 W xenon lamp ( $\lambda=300\sim 1100$  nm). Before the catalytic tests, 100 mg CeBTDD-A as the photocatalyst and 10 g ethylbenzene were added in 250 mL three-necked flask. Through controlling by air generator and flowmeter, fresh air is injected into the reaction system at a flow rate of 1 mL/min. Meanwhile, the reaction environment was controlled at room temperature by using thermostatic waterbath and cooling water circulation.

**Supplementary Table 11.** Comparison of the photocatalytic aerobic oxidation of ethylbenzene activities of the reported heterogeneous materials.

|    | Catalyst                                                            | Oxidant                       | Temperature (°C) | Pressure (bar) | Solvent                                                 | Ethylbenzene (mmol) | Yield |        | Illumination          | Ref.      |
|----|---------------------------------------------------------------------|-------------------------------|------------------|----------------|---------------------------------------------------------|---------------------|-------|--------|-----------------------|-----------|
|    |                                                                     |                               |                  |                |                                                         |                     | %     | μmol/g |                       |           |
| 1  | CeBTDD-A                                                            | Air                           | rt.              | 1              | Solvent-free                                            | 94.2                | 91.4  | 861    | 300-780 nm            | This work |
| 2  | CF <sub>3</sub> SO <sub>2</sub> Na                                  | O <sub>2</sub>                | rt.              | 1              | CH <sub>3</sub> CN                                      | 10                  | 89    | 22.81  | 400-405 nm blue light | 2         |
| 3  | Chlorinated BiOBr/TiO <sub>2</sub>                                  | O <sub>2</sub>                | rt.              | 1              | Solvent-free                                            | 8.17                |       | 14.21  | 420-780 nm            | 3         |
| 4  | VO@g-C <sub>3</sub> N <sub>4</sub>                                  | H <sub>2</sub> O <sub>2</sub> | rt.              | 1              | CH <sub>3</sub> CN                                      | 1                   | 99    | 39.62  | 40 W domestic bulb    | 4         |
| 5  | [Fe(TPA)(MeCN) <sub>2</sub> ](ClO <sub>4</sub> ) <sub>2</sub> /RF T | Air                           | rt.              | 1              | CH <sub>3</sub> CN, H <sub>2</sub> O, HClO <sub>4</sub> | 0.02                | 74    | 62.8   | 440 nm                | 5         |
| 6  | Cs <sub>3</sub> Bi <sub>2</sub> Br <sub>9</sub> /SBA-15             | Air                           | rt.              | 1              | Solvent-free                                            | 41.03               | 0.16  | 65.8   | ≥420 nm               | 6         |
| 7  | TTMBPY·3Br                                                          | Air                           | rt.              | 1              | CH <sub>3</sub> CN                                      | 0.1                 | 82    | 64.06  | 365 nm LED            | 7         |
| 8  | [BSPy][Otf]                                                         | O <sub>2</sub>                | rt.              | 1              | CH <sub>3</sub> CN                                      | 1                   | 92    | 50.36  | 365 nm                | 8         |
| 9  | <i>p</i> -BiOBr                                                     | O <sub>2</sub>                | rt.              | 1              | H <sub>2</sub> O, <i>t</i> -BuOH                        | 0.2                 | 93    | 9.3    | >400 nm               | 9         |
| 10 | <i>α</i> -Fe <sub>2</sub> O <sub>3</sub>                            | O <sub>2</sub>                | 40               | 1              | CH <sub>3</sub> CN, NHPI                                | 0.1                 | 74    | 7.4    | 455 nm LED            | 10        |
| 11 | Cercosporin                                                         | O <sub>2</sub>                | rt.              | 1              | KBr, CH <sub>3</sub> OH                                 | 0.25                | 78    | 73.03  | 23 W CFL              | 11        |
| 12 | Imide-acridinium salt PC III                                        | Air                           | rt.              | 1              | CH <sub>3</sub> CN, H <sub>2</sub> O                    | 0.1                 | 96    | 24.62  | 457 nm LEDs           | 12        |
| 13 | SA-Fe-TCN                                                           | O <sub>2</sub>                | 60               | 1              | CH <sub>3</sub> CN, NHPI, TEA                           | 0.5                 | 99    | 9.9    | > 420 nm              | 13        |
| 14 | Cu-PMOF-3 (Fe)                                                      | Air                           | 60               | 1              | CH <sub>3</sub> CN, NHPI                                | 0.2                 | 82    | 41     |                       | 14        |
| 15 | bisCu                                                               | O <sub>2</sub>                | 70               | 5              | CH <sub>3</sub> CN, NHPI                                | 5                   | 72    | 72     |                       | 15        |
| 16 | Mo(VI)-V(V)                                                         | O <sub>2</sub>                | 75               | 1              | CH <sub>3</sub> COOH, NHPI                              | 1                   | 80    | 61.54  |                       | 16        |
| 17 | Pt-BNP                                                              | O <sub>2</sub> , TBHP         | 80               | 1              | H <sub>2</sub> O                                        | 9.43                | 93    | 58.13  |                       | 17        |

|    |                                                                                    |                               |     |    |                                             |       |    |            |  |    |
|----|------------------------------------------------------------------------------------|-------------------------------|-----|----|---------------------------------------------|-------|----|------------|--|----|
| 18 | Bioderived<br>Cu <sub>3</sub> (PO <sub>4</sub> ) <sub>2</sub>                      | O <sub>2</sub>                | 100 | 40 | CH <sub>3</sub> CN,<br>NHPI                 | 1     | 93 | 9.3        |  | 18 |
| 19 | (La,Sr) <sub>0.5</sub> -<br>(Mn,Co) <sub>0.5</sub> O <sub>2.38</sub>               | O <sub>2</sub>                | 90  | 20 | CH <sub>3</sub> COOH,<br>NHPI               | 13.75 | 37 | 101.7<br>5 |  | 19 |
| 20 | LC-N-8.9                                                                           | TBHP                          | 80  | 1  | H <sub>2</sub> O                            | 1     | 91 | 91.3       |  | 20 |
| 21 | MFM-170                                                                            | TBHP                          | 65  | 1  | CH <sub>3</sub> CN                          | 0.25  | 30 | 3          |  | 21 |
| 22 | rac-1                                                                              | H <sub>2</sub> O <sub>2</sub> | rt. | 1  | CH <sub>3</sub> COOH,<br>CH <sub>3</sub> CN | 0.5   | 82 | 53.95      |  | 22 |
| 23 | SDC-A                                                                              | TBHP                          | 80  | 1  | Solvent-free                                | 1     | 93 | 46.5       |  | 23 |
| 24 | DACAQ/NHPI<br>/HY                                                                  | O <sub>2</sub>                | 80  | 3  | CH <sub>3</sub> CN,<br>NHPI                 | 16.41 | 61 | 79.48      |  | 24 |
| 25 | Fe-N-C-700                                                                         | TBHP                          | rt. | 1  | H <sub>2</sub> O                            | 0.5   | 99 | 49.5       |  | 25 |
| 26 | [Fe(qpy)](ClO <sub>4</sub> ) <sub>2</sub>                                          | Oxone                         | 80  | 1  | CH <sub>3</sub> CN,<br>H <sub>2</sub> O     | 0.2   | 41 | 11.33      |  | 26 |
| 27 | 0.5%Pd@C-<br>GluA-550                                                              | Air                           | 120 | 1  | Solvent-free                                | 32.83 | 13 | 219.1<br>4 |  | 27 |
| 28 | [(pymox-<br>Me <sub>2</sub> )RuCl <sub>2</sub> ] <sup>+</sup> B<br>F <sup>4-</sup> | t-<br>BuOOH                   | rt. | 1  | H <sub>2</sub> O                            | 1     | 83 | 136.0<br>7 |  | 28 |

The green area represents the photocatalytic systems, the blue area represents the thermocatalytic systems.

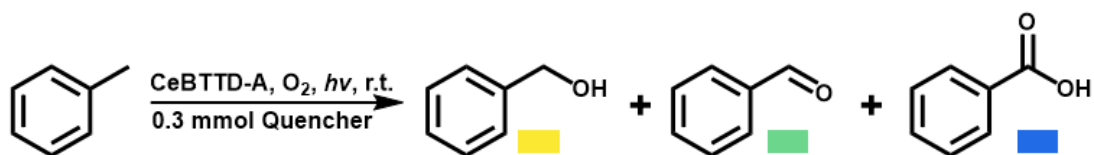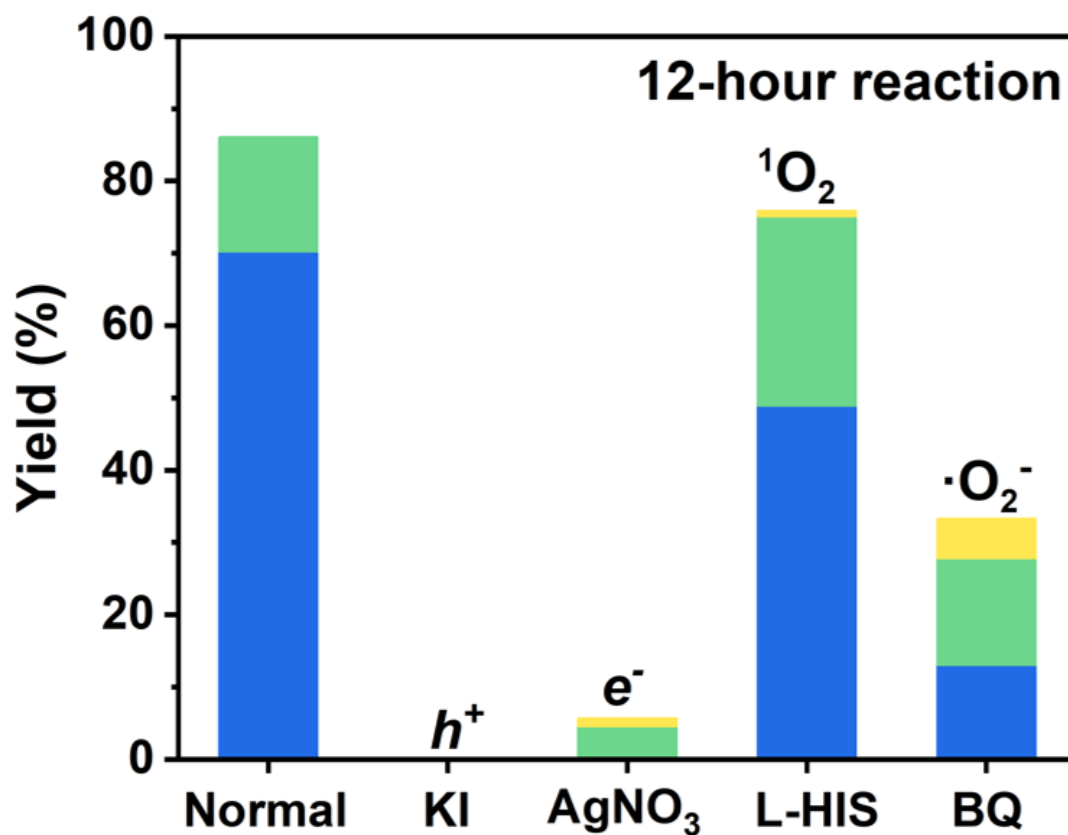

**Supplementary Figure 27.** Control experiments for photocatalytic toluene oxidation by CeBTDD-A under normal condition or with different quenchers.

Normal condition: 5 mg photocatalyst, 0.1 mmol substrate, 4 hours, 3 mL CH<sub>3</sub>CN as the reagent, 300 W xenon light irradiation (300-1100 nm), 1 atm O<sub>2</sub>.

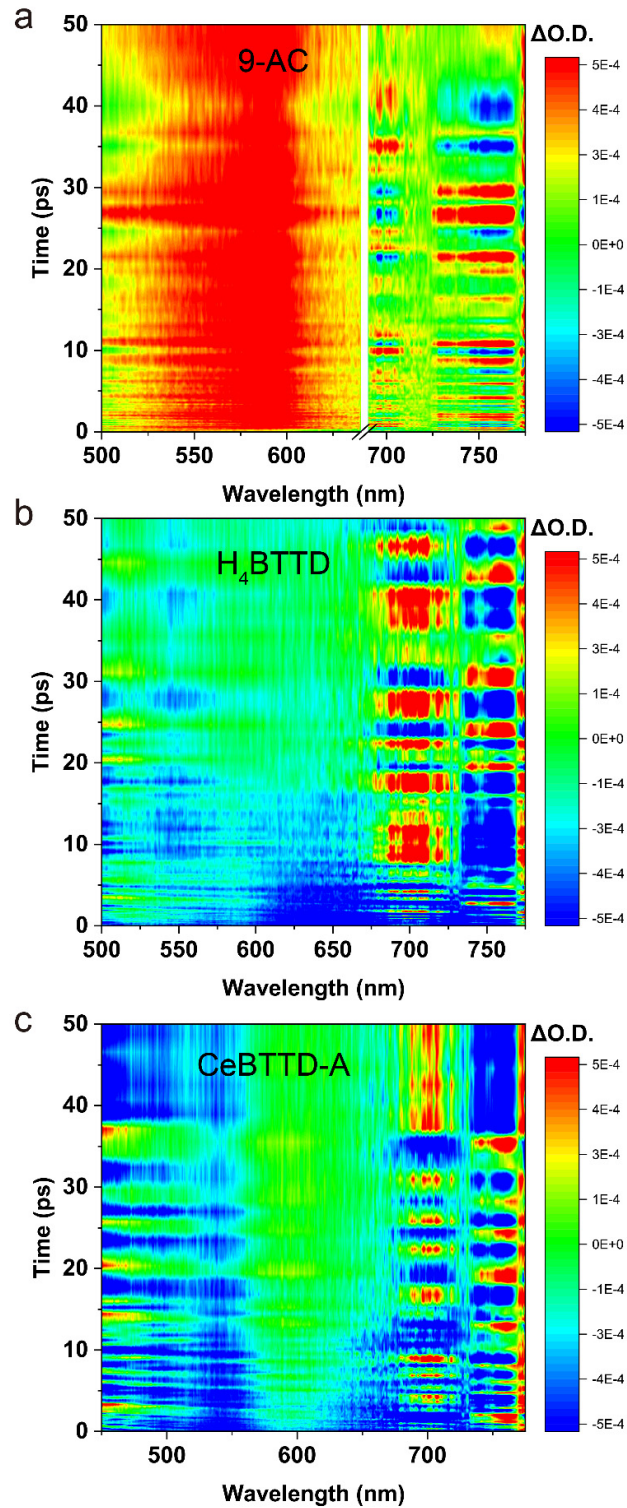

**Supplementary Figure 28.** TA spectra of 9-AC, H<sub>4</sub>BTDD and CeBTDD-A probed within the region of 450-780 nm. excitation wavelength: **a** 9-AC (340 nm), **b** H<sub>4</sub>BTDD (400 nm) and **c** CeBTDD-A (400 nm).

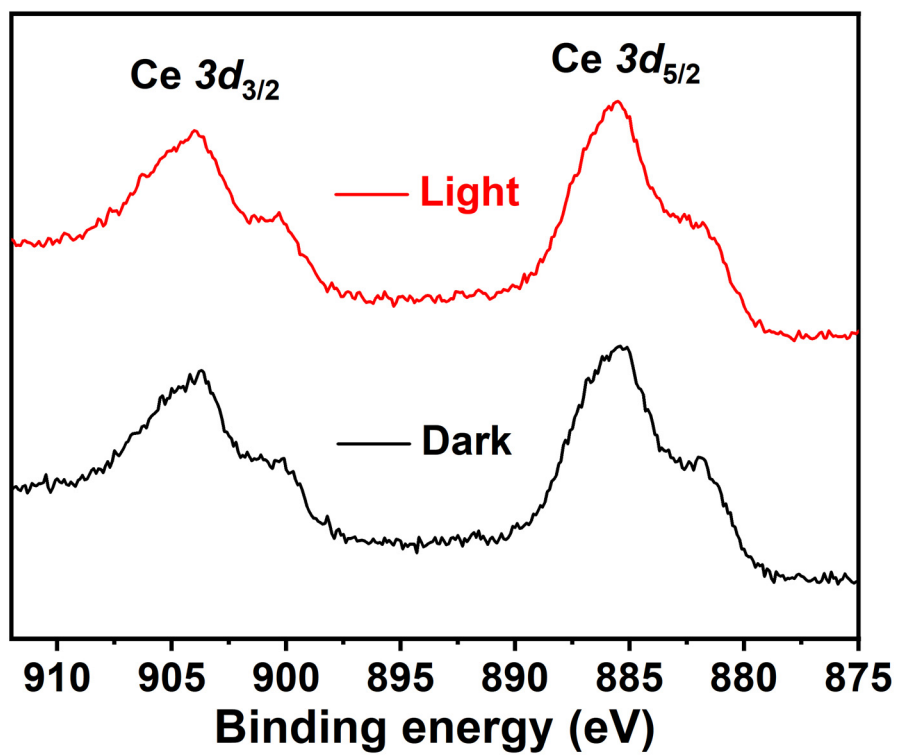

**Supplementary Figure 29.** In situ high-resolution Ce 3d XPS spectra of CeBTDD-A in dark (black curve) and light (red curve) conditions.



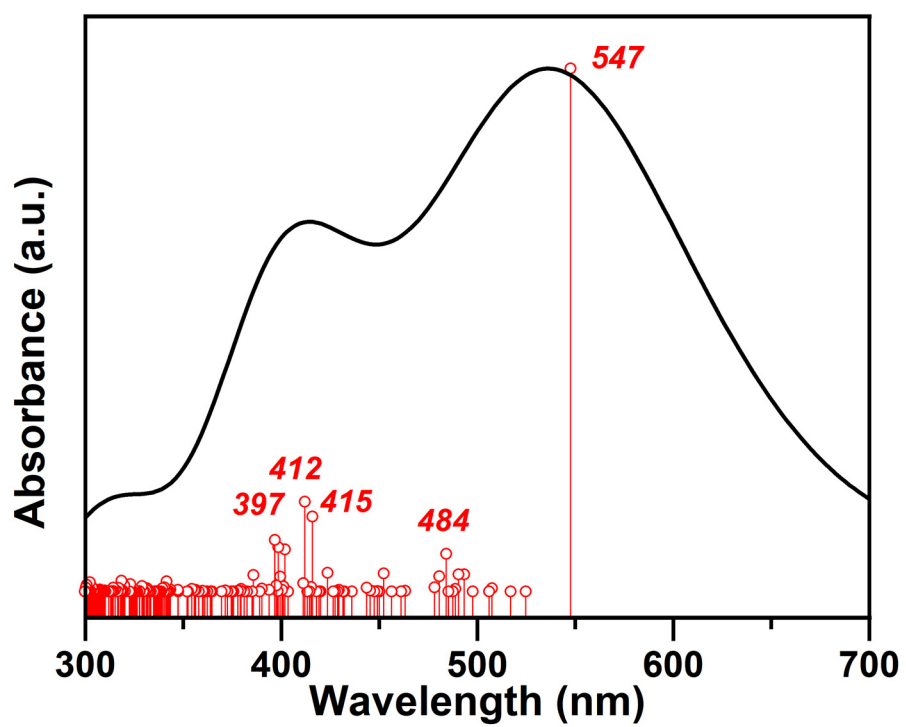

Supplementary Figure 30. Calculated absorption spectrum of CeBTDD-A.

**Supplementary Table 12.** Absorption peaks  $\lambda_{\text{abs}}$  [in eV (nm)], the oscillator strengths ( $f$ ), major contributions and assignments (H and L represent HOMO and LUMO, respectively).

| $\lambda_{\text{abs}}$ | $f$   | Major Contributions | Major Assignments |
|------------------------|-------|---------------------|-------------------|
| 547                    | 0.428 | H-3→L (96%),        | BTDD→BTDD         |
| 484                    | 0.031 | H-1→L+1 (49%)       | 9-AC→BTDD         |
| 415                    | 0.062 | H→L+2 (76%)         | 9-AC→9-AC         |
| 412                    | 0.074 | H-1→L+2 (78%)       | 9-AC→9-AC         |
| 397                    | 0.042 | H-1→L+4 (86%)       | 9-AC→9-AC         |

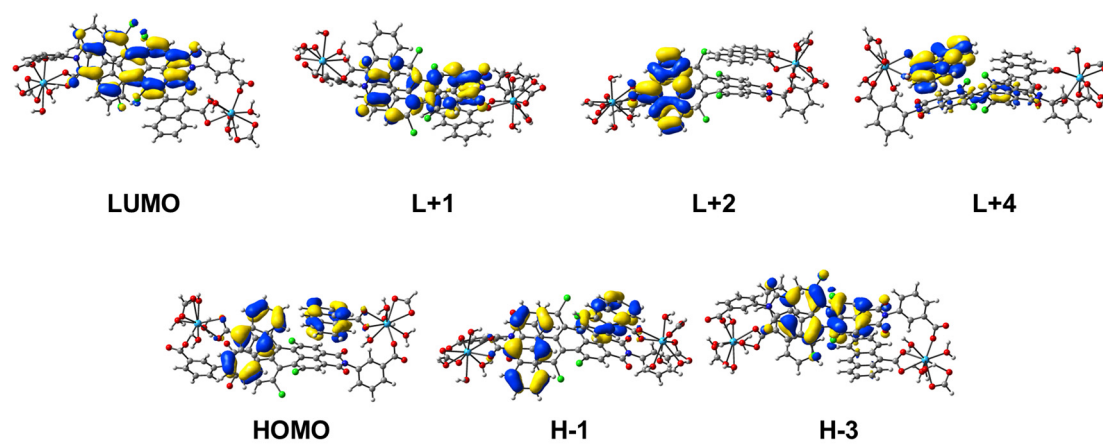

**Supplementary Figure 31.** The calculated major frontier molecular orbital distributions involved in excitation process of Supplementary Table 12.

### <sup>1</sup>H NMR and GC-MS analysis of products.

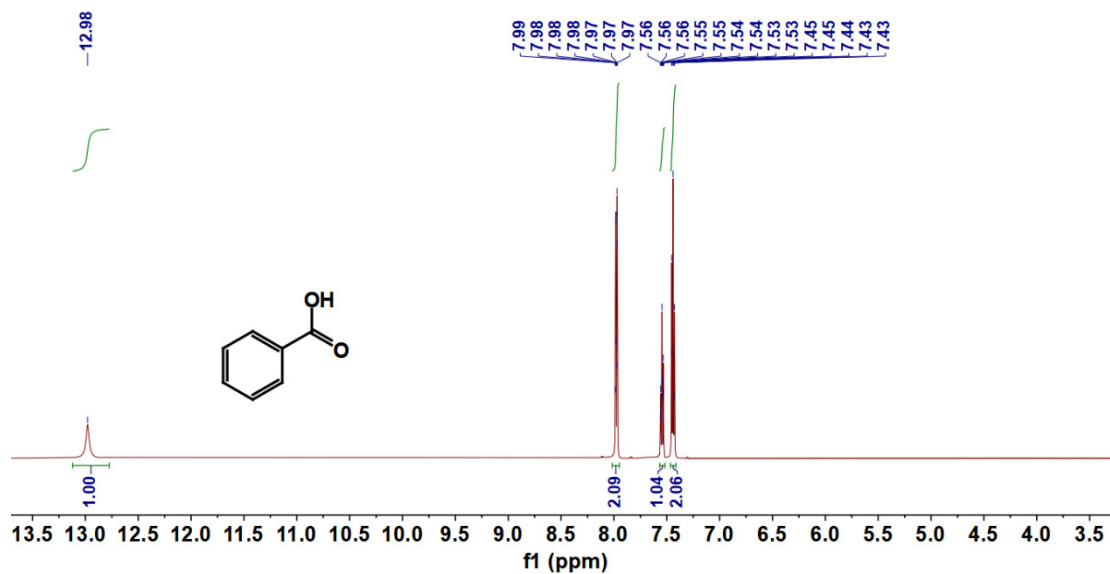

**Supplementary Figure 32.** <sup>1</sup>H NMR spectrum of the reaction product using toluene as substrate in Figure 4a.

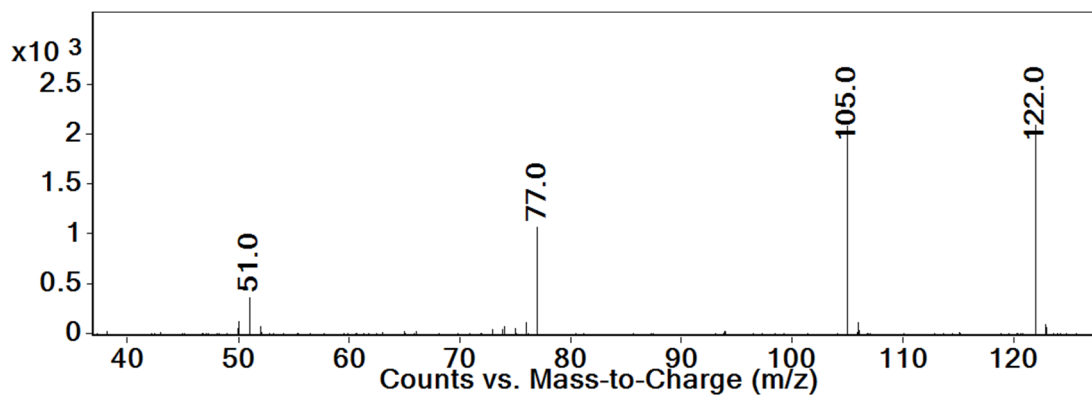

**Supplementary Figure 33.** Mass spectrum of the reaction product using toluene as substrate.

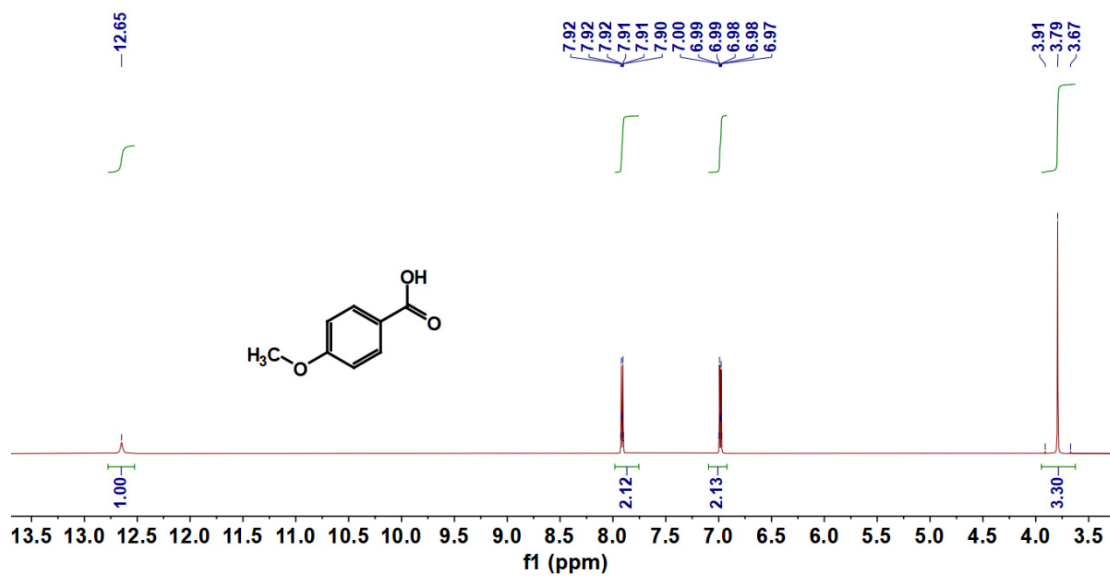

**Supplementary Figure 34.**  $^1\text{H}$  NMR spectrum of the reaction product using 4-methylanisole as substrate in Figure 4a.

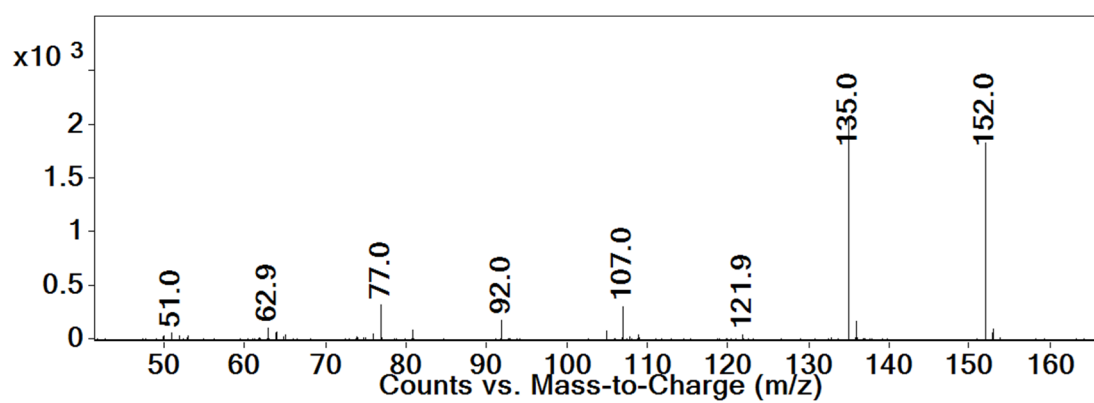

**Supplementary Figure 35.** Mass spectrum of the reaction product using 4-methylanisole as substrate.

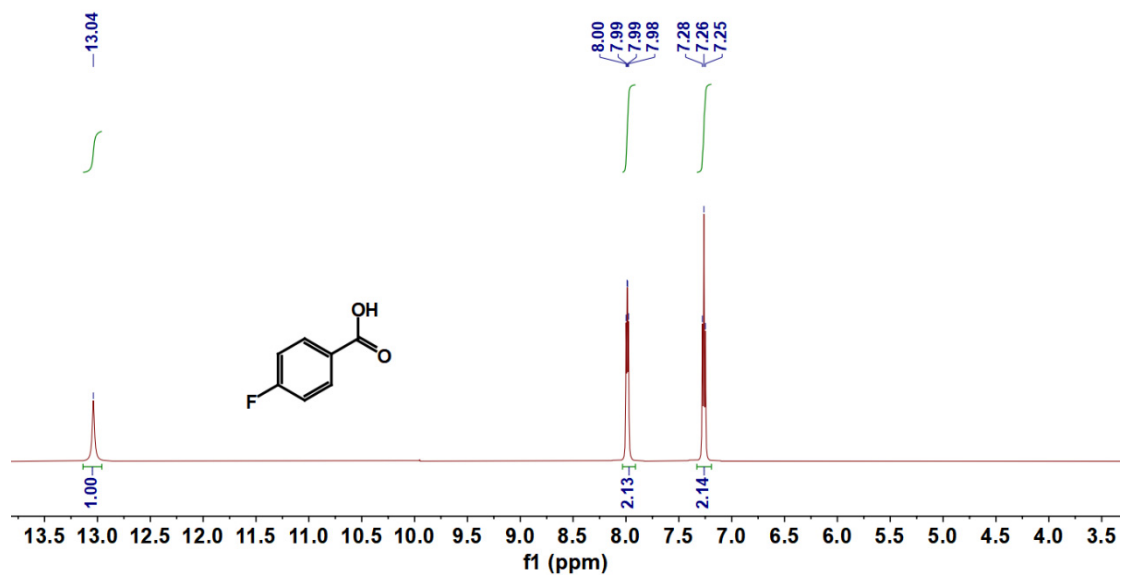

**Supplementary Figure 36.** <sup>1</sup>H NMR spectrum of the reaction product using p-fluorotoluene as substrate in Figure 4a.

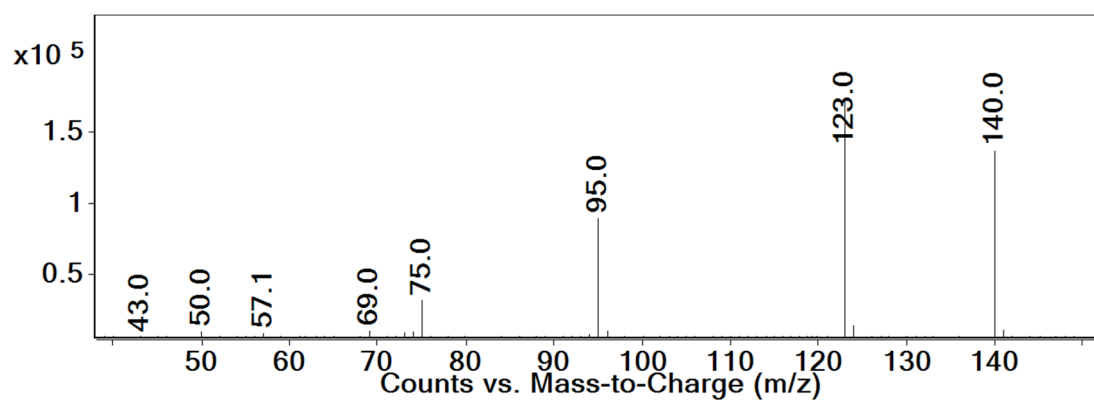

**Supplementary Figure 37.** Mass spectrum of the reaction product using p-fluorotoluene as substrate.

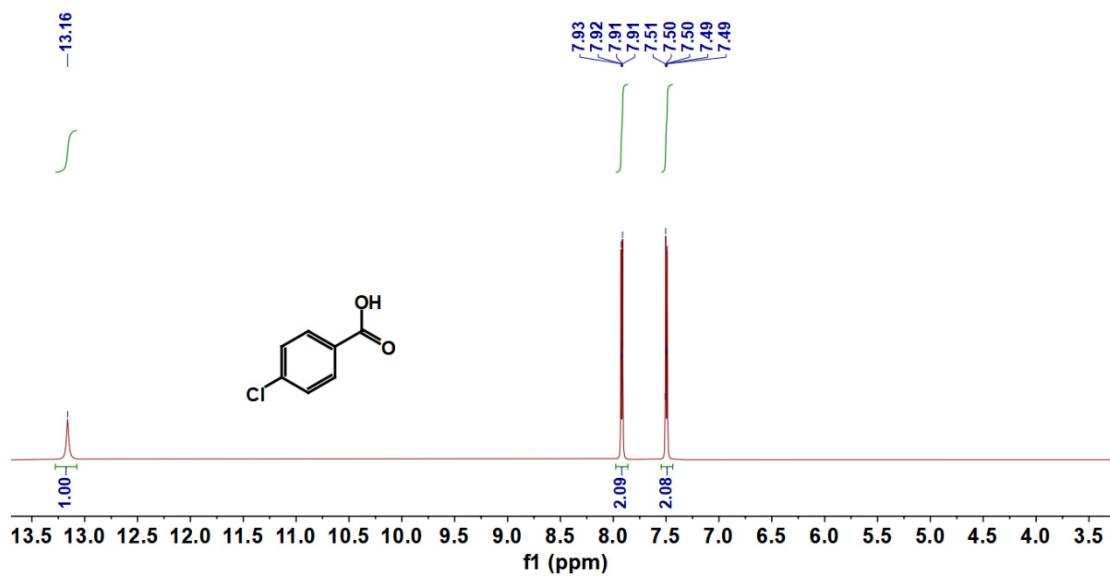

**Supplementary Figure 38.** <sup>1</sup>H NMR spectrum of the reaction product using 4-chlorotoluene as substrate in Figure 4a.

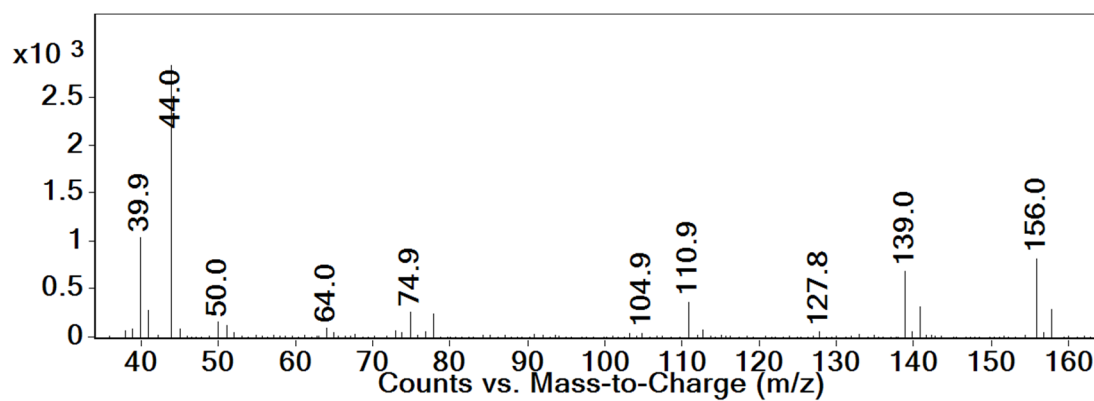

**Supplementary Figure 39.** Mass spectrum of the reaction product using 4-chlorotoluene as substrate.

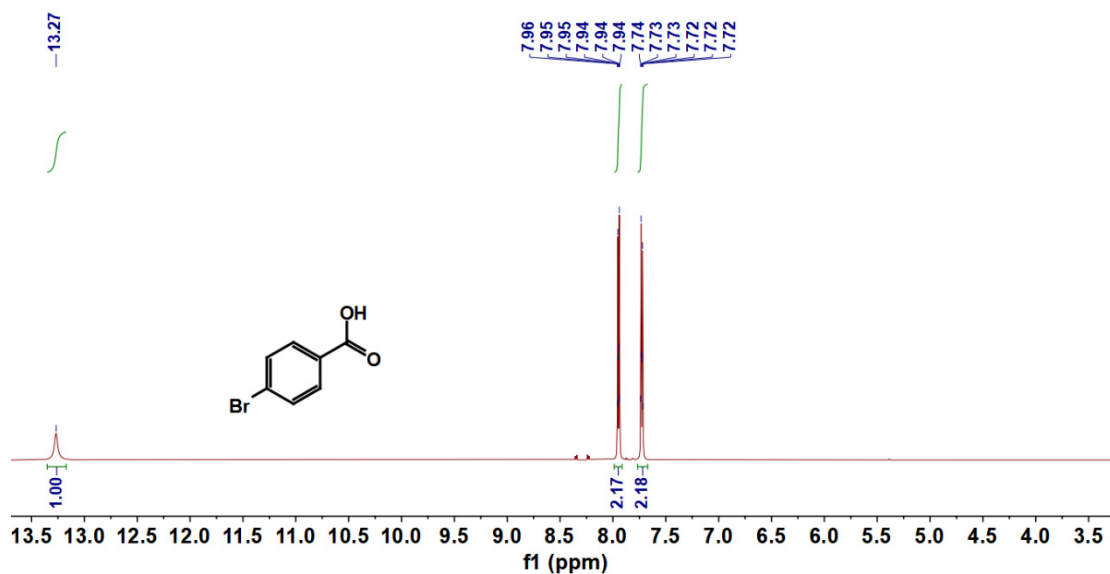

**Supplementary Figure 40.** <sup>1</sup>H NMR spectrum of the reaction product using p-bromotoluene as substrate in Figure 4a.

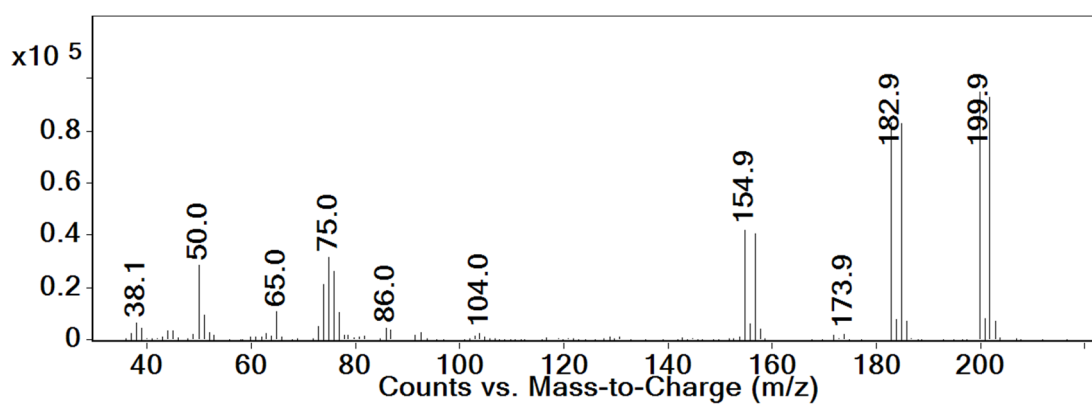

**Supplementary Figure 41.** Mass spectrum of the reaction product using p-bromotoluene as substrate.



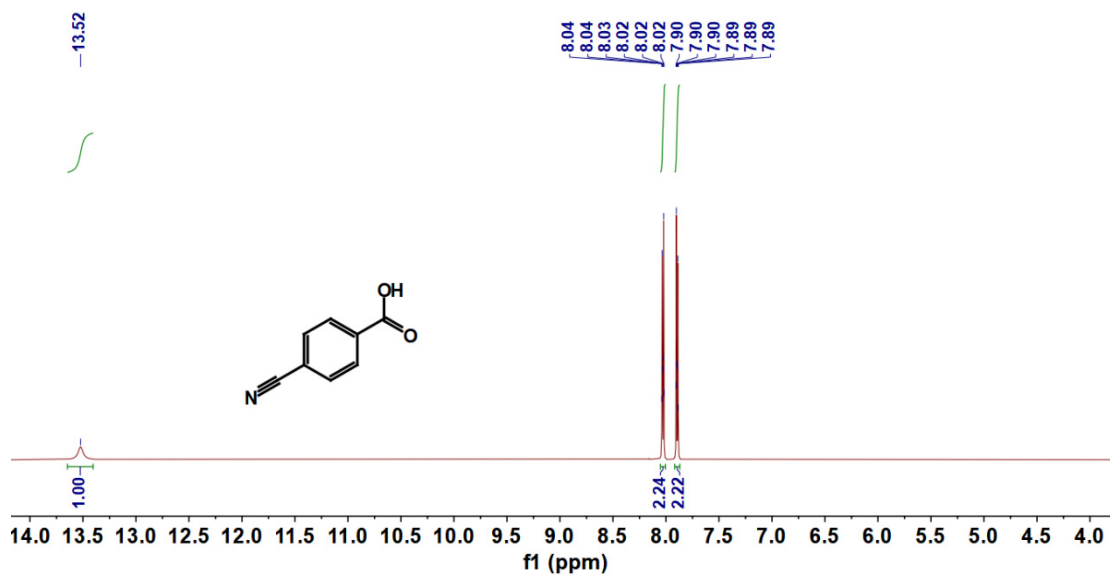

**Supplementary Figure 42.**  $^1\text{H}$  NMR spectrum of the reaction product using p-tolunitrile as substrate in Figure 4a.

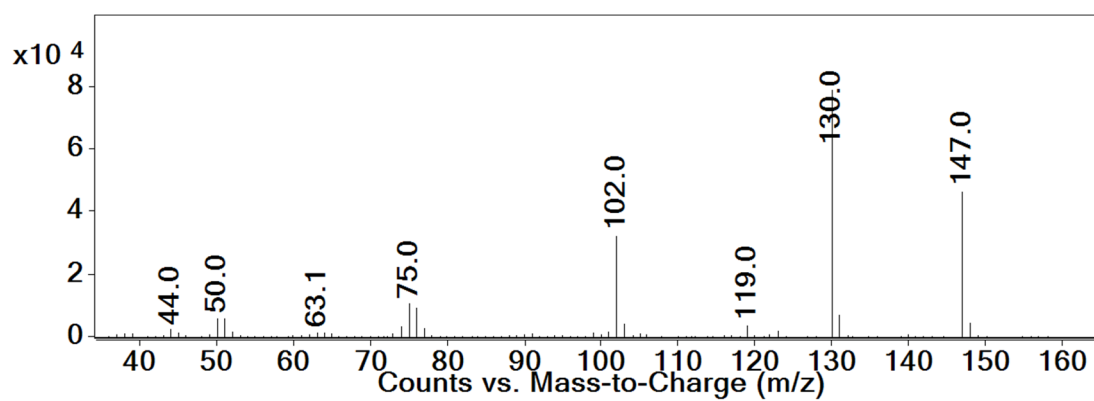

**Supplementary Figure 43.** Mass spectrum of the reaction product using p-tolunitrile as substrate.

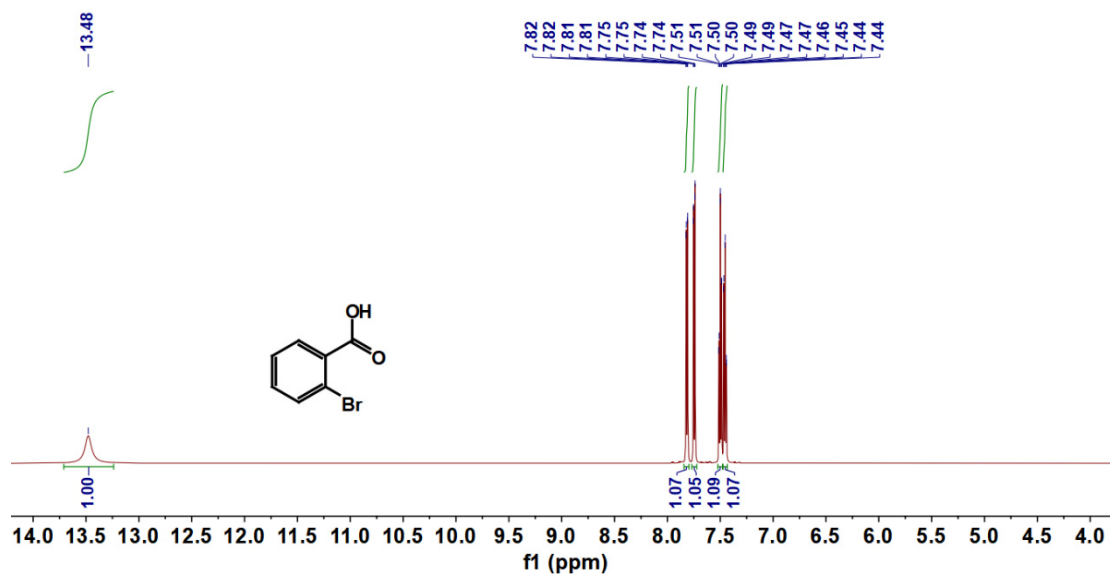

**Supplementary Figure 44.**  $^1\text{H}$  NMR spectrum of the reaction product using 2-bromotoluene as substrate in Figure 4a.

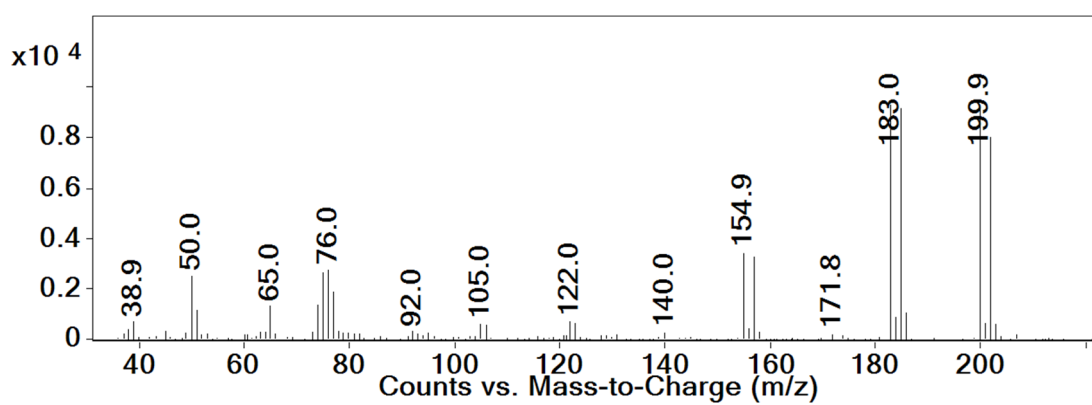

**Supplementary Figure 45.** Mass spectrum of the reaction product using 2-bromotoluene as substrate.

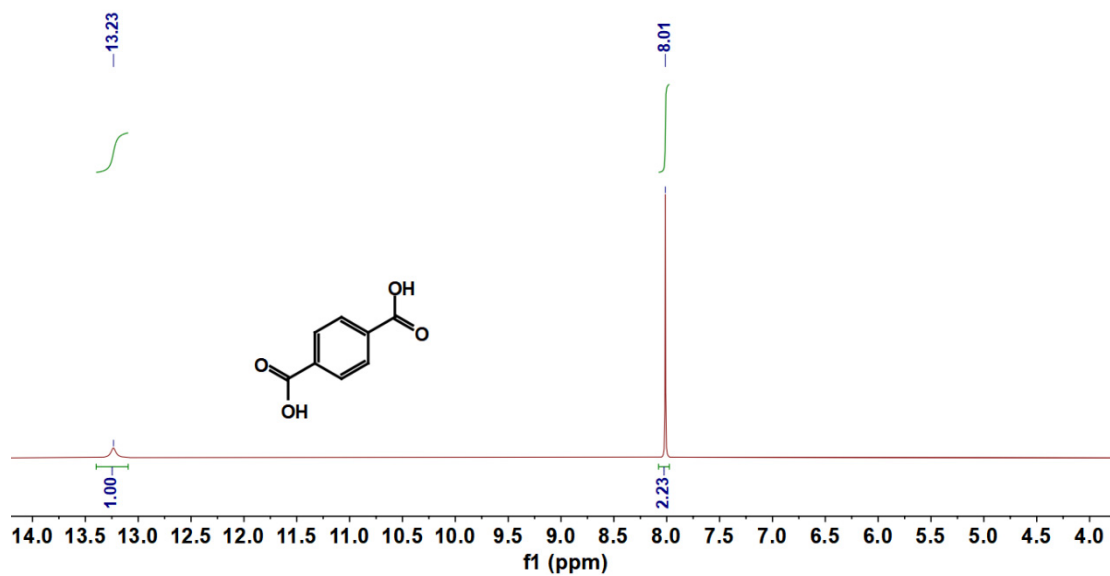

**Supplementary Figure 46.** <sup>1</sup>H NMR spectrum of the reaction product using paraxylene as substrate in Figure 4a.

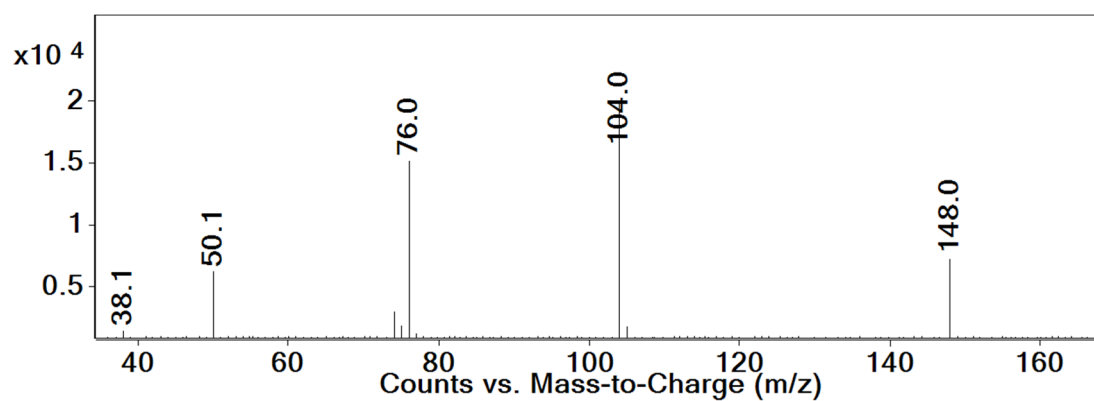

**Supplementary Figure 47.** Mass spectrum of the reaction product using paraxylene as substrate.



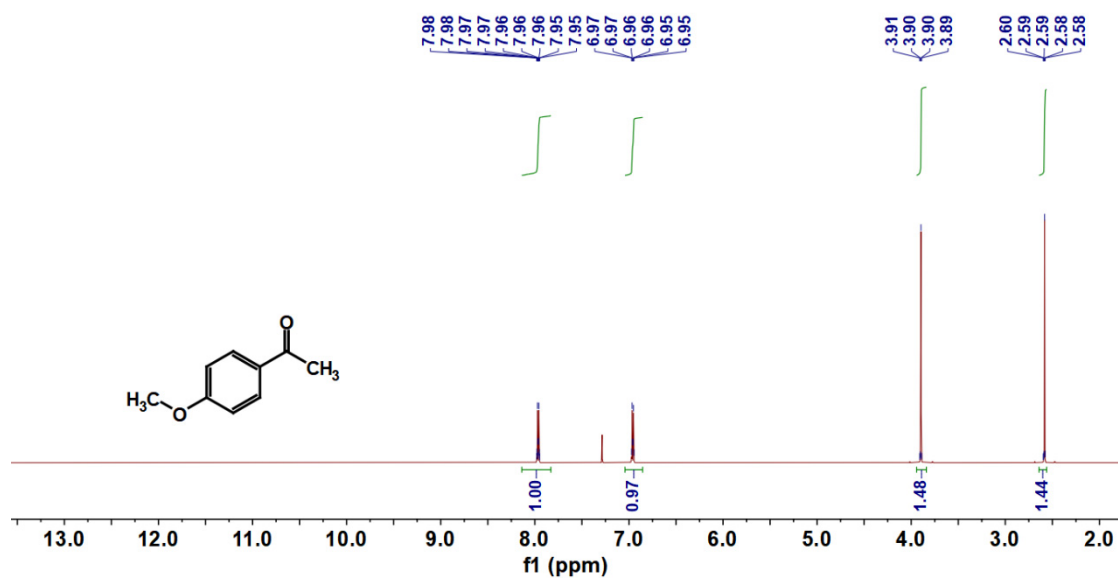

**Supplementary Figure 50.**  $^1\text{H}$  NMR spectrum of the reaction product using 4-ethylanisole as substrate in Figure 4a.

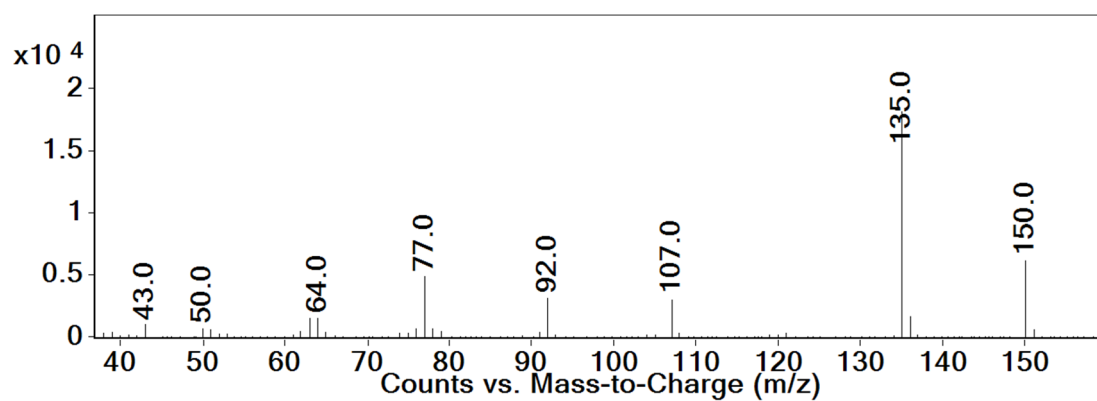

**Supplementary Figure 51.** Mass spectrum of the reaction product using 4-ethylanisole as substrate.

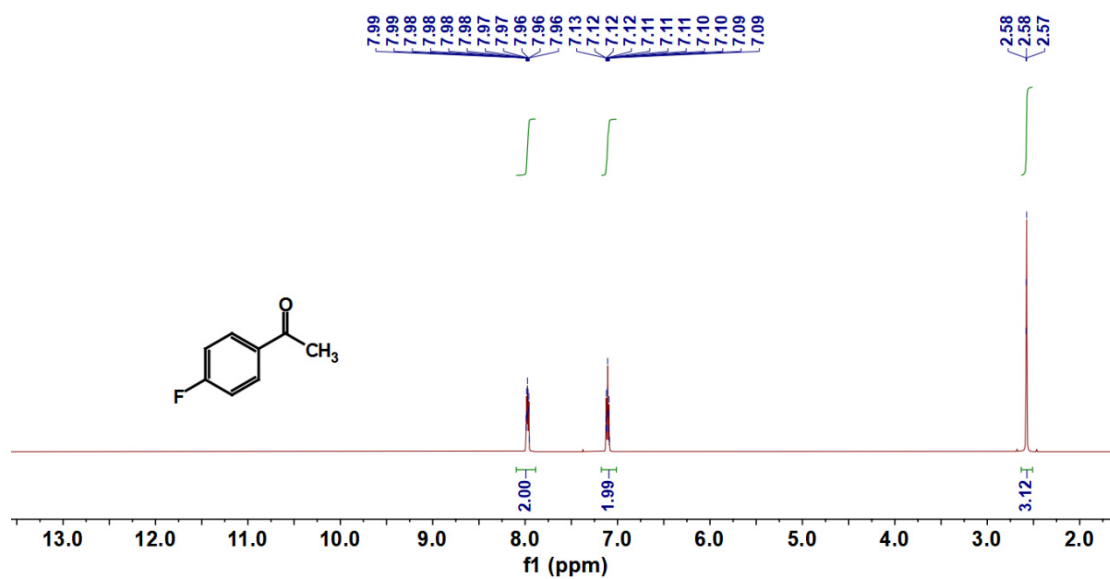

**Supplementary Figure 52.**  $^1\text{H}$  NMR spectrum of the reaction product using 1-ethyl-4-fluorobenzene as substrate in Figure 4a.

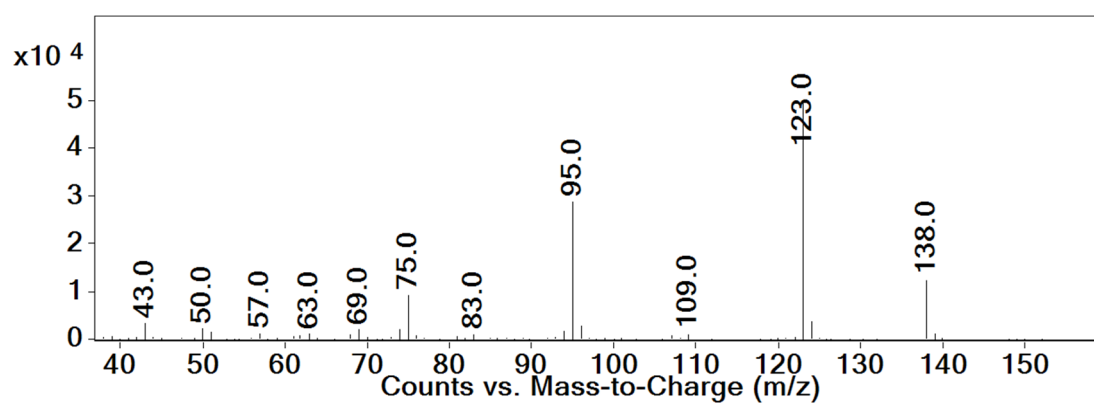

**Supplementary Figure 53.** Mass spectrum of the reaction product using 1-ethyl-4-fluorobenzene as substrate.

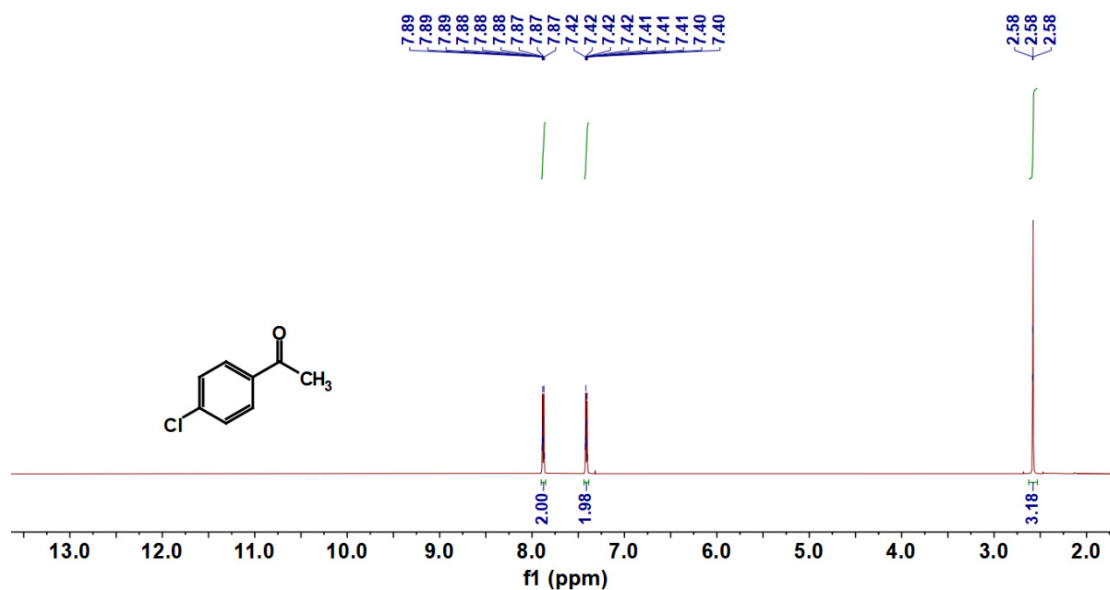

**Supplementary Figure 54.**  $^1\text{H}$  NMR spectrum of the reaction product using 1-chloro-4-ethylbenzene as substrate in Figure 4a.

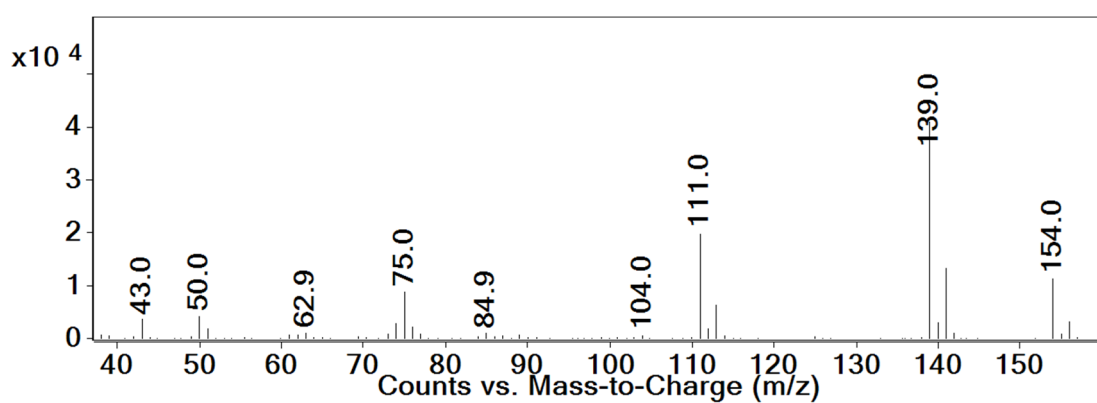

**Supplementary Figure 55** Mass spectrum of the reaction product using 1-chloro-4-ethylbenzene as substrate.

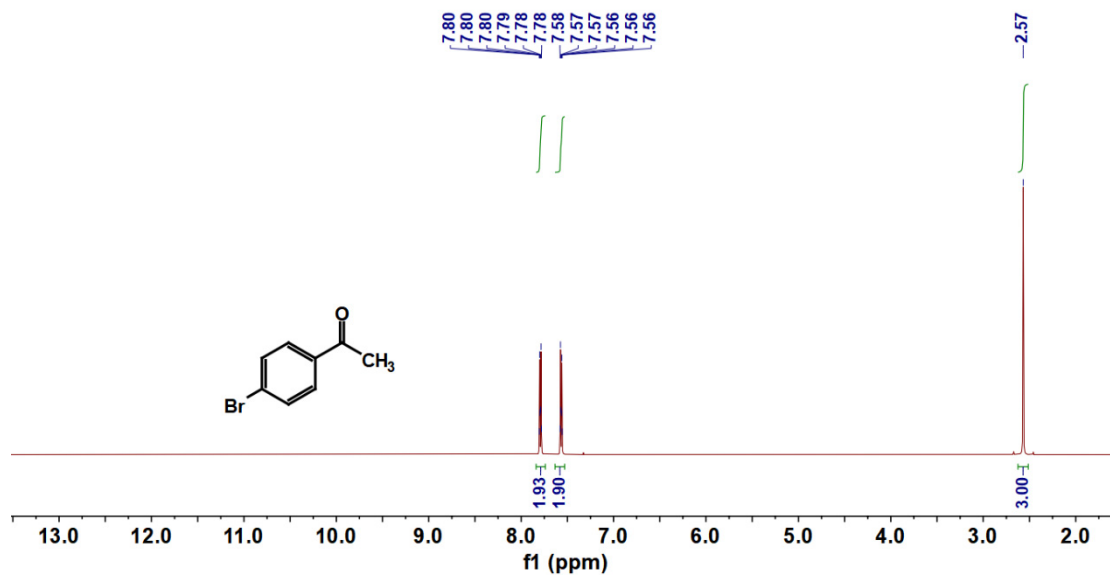

**Supplementary Figure 56.**  $^1\text{H}$  NMR spectrum of the reaction product using 1-bromo-4-ethylbenzene as substrate in Figure 4a.

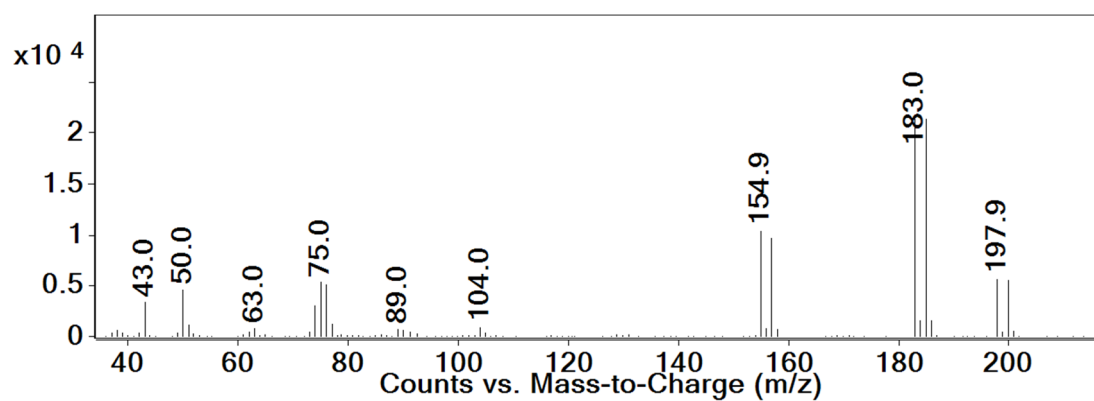

**Supplementary Figure 57.** Mass spectrum of the reaction product using 1-bromo-4-ethylbenzene as substrate.



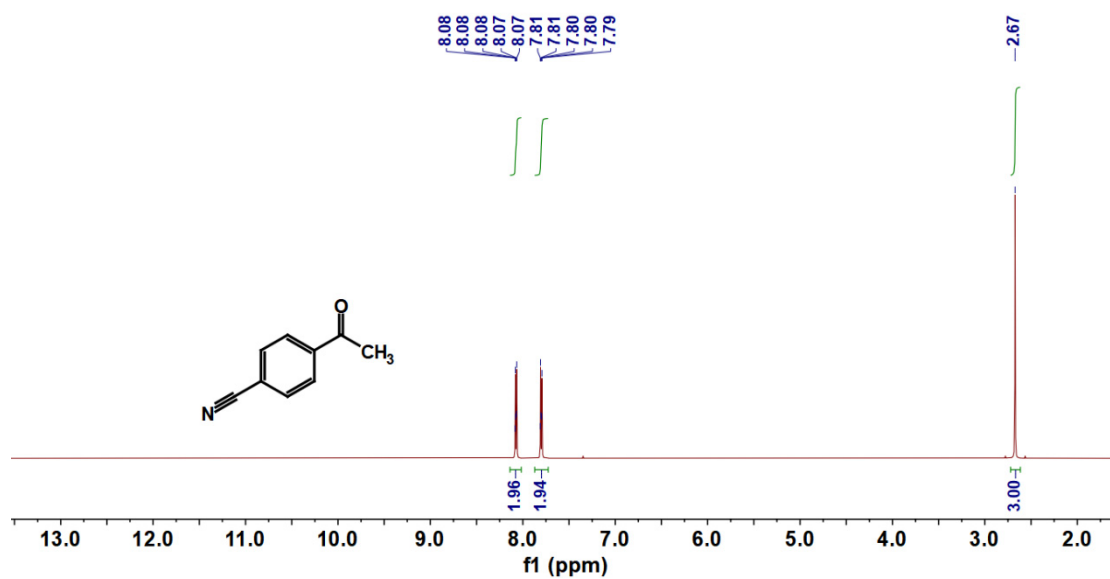

**Supplementary Figure 58.**  $^1\text{H}$  NMR spectrum of the reaction product using 4-ethylbenzoinitrile as substrate in Figure 4a.

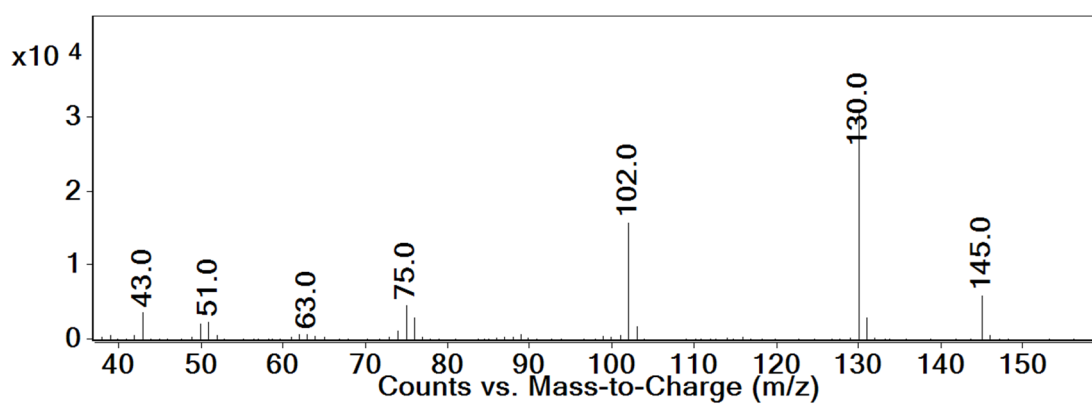

**Supplementary Figure 59.** Mass spectrum of the reaction product using 4-ethylbenzoinitrile as substrate.

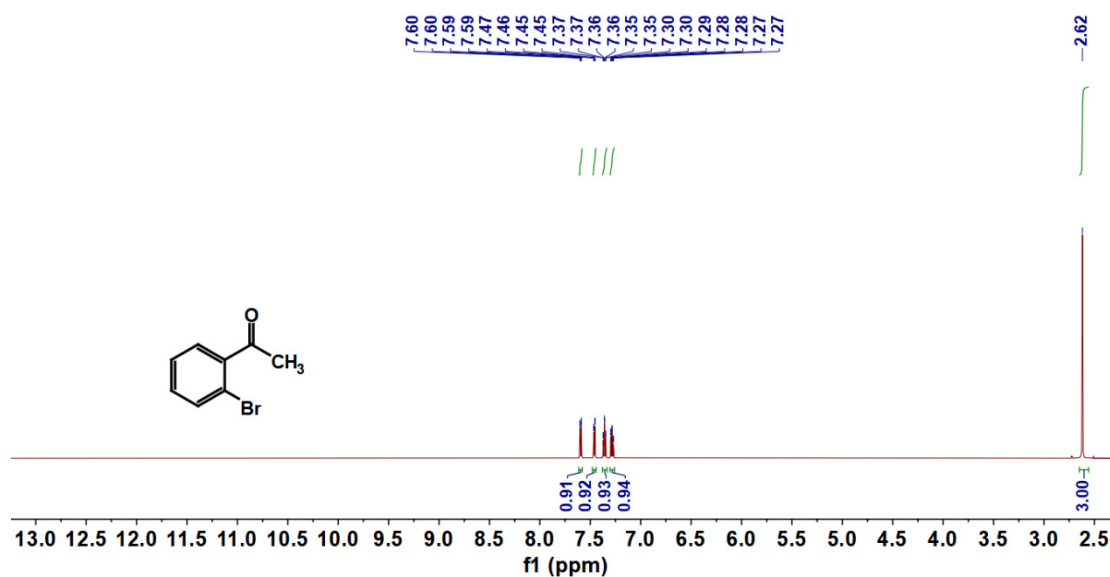

**Supplementary Figure 60.** <sup>1</sup>H NMR spectrum of the reaction product using 2-bromoethylbenzene as substrate in Figure 4a.

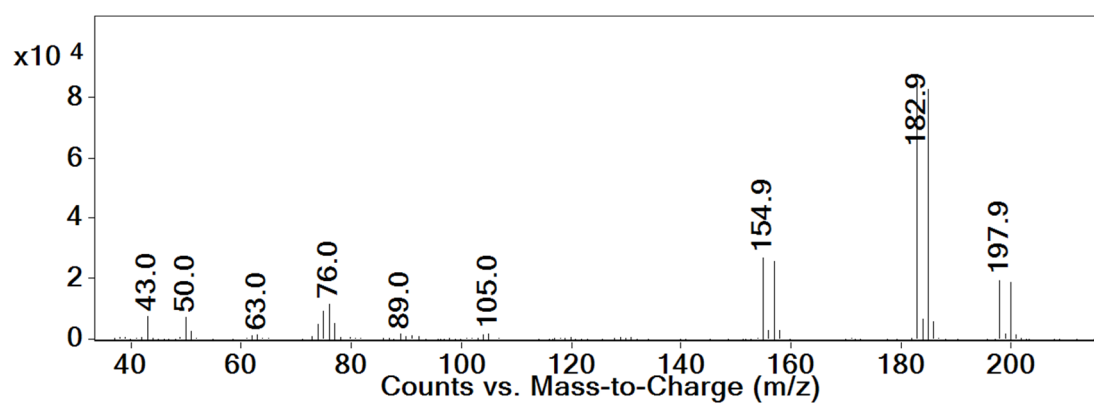

**Supplementary Figure 61.** Mass spectrum of the reaction product using 2-bromoethylbenzene as substrate.

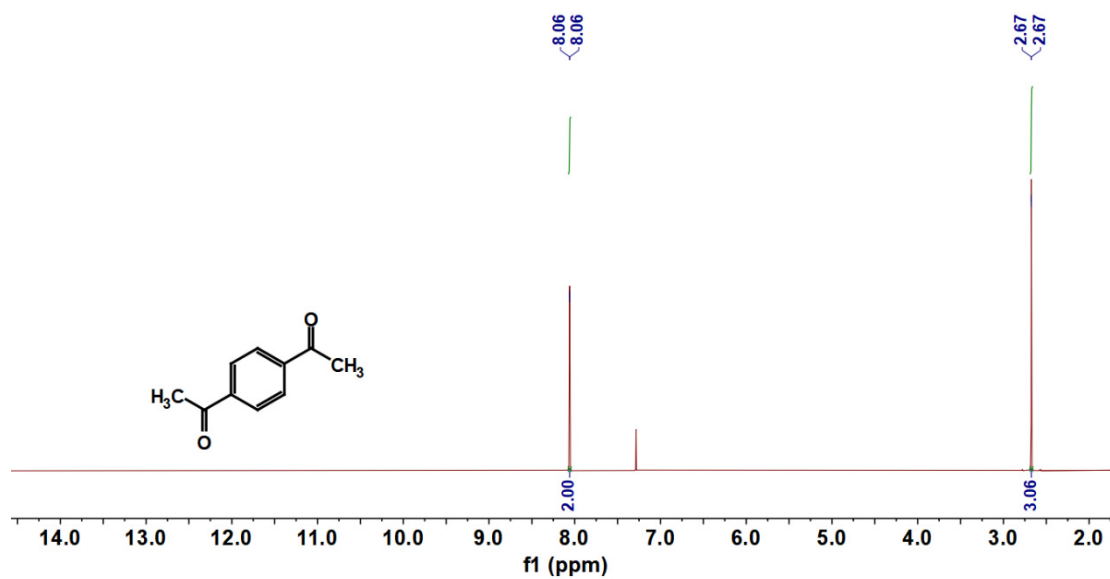

**Supplementary Figure 62.** <sup>1</sup>H NMR spectrum of the reaction product using 1,4-diethylbenzene as substrate in Figure 4a.

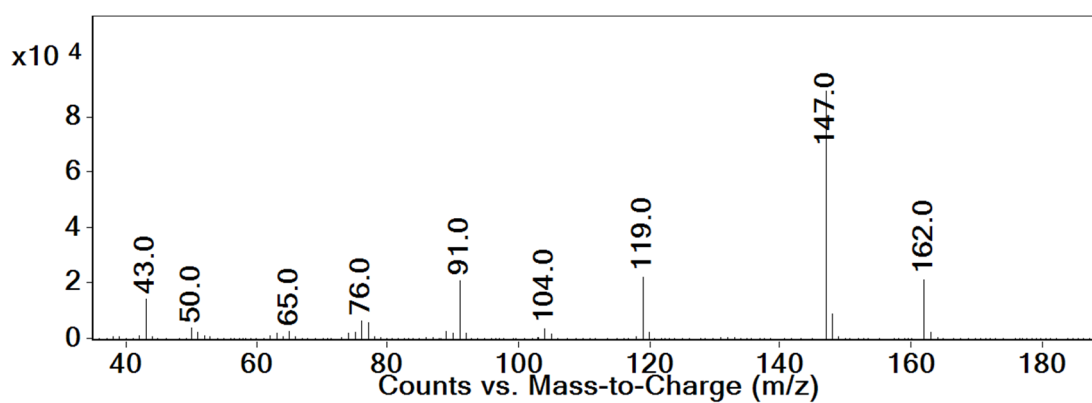

**Supplementary Figure 63.** Mass spectrum of the reaction product using 1,4-diethylbenzene as substrate.

## Supplementary References

1. Bêche, E., *et al.* Ce 3d XPS investigation of cerium oxides and mixed cerium oxide ( $Ce_xTi_yO_z$ ). *Surf. Interface Anal.* **40**, 264-267 (2008).
2. Zhu, X. *et al.* Light and oxygen-enabled sodium trifluoromethanesulfinate-mediated selective oxidation of C-H bonds. *Green Chem.* **22**, 4357-4363 (2020).
3. Yuan, R. *et al.* Chlorine-Radical-Mediated Photocatalytic Activation of C-H Bonds with Visible Light. *Angew. Chem. Int. Ed.* **52**, 1035-1039 (2013).
4. Verma, S., Nasir Baig, R. B., Nadagouda, M. N. & Varma, R. S. Photocatalytic C-H Activation of Hydrocarbons over VO@g-C<sub>3</sub>N<sub>4</sub>. *ACS Sustainable Chem. Eng.* **4**, 2333-2336 (2016).
5. Mühlendorf, B. & Wolf, R. C-H Photooxygenation of Alkyl Benzenes Catalyzed by Riboflavin Tetraacetate and a Non-Heme Iron Catalyst. *Angew. Chem. Int. Ed.* **55**, 427-430 (2016).
6. Dai, Y. *et al.* A Supported Bismuth Halide Perovskite Photocatalyst for Selective Aliphatic and Aromatic C-H Bond Activation. *Angew. Chem. Int. Ed.* **59**, 5788-5796 (2020).
7. Ma, S. *et al.* Redox-active and Brønsted basic dual sites for photocatalytic activation of benzylic C-H bonds based on pyridinium derivatives. *Green Chem.* **24**, 2492-2498 (2022).
8. Wu, J. *et al.* Brønsted acid-catalysed aerobic photo-oxygenation of benzylic C-H bonds. *Green Chem.* **25**, 940-945 (2023).
9. Cao, X. *et al.* Engineering Lattice Disorder on a Photocatalyst: Photochromic BiOBr Nanosheets Enhance Activation of Aromatic C-H Bonds via Water Oxidation. *J. Am. Chem. Soc.* **144**, 3386-3397 (2022).
10. Zhang, C. *et al.* Generation and Confinement of Long-Lived N-Oxyl Radical and Its Photocatalysis. *J. Am. Chem. Soc.* **140**, 2032-2035 (2018).
11. Li, J. *et al.* Cercosporin-bioinspired selective photooxidation reactions under mild conditions. *Green Chem.* **21**, 6073-6081 (2019).
12. Uygur, M. *et al.* Metal- and additive-free C-H oxygenation of alkylarenes by visible-light photoredox catalysis. *Green Chem.* **23**, 3392-3399 (2021).
13. Xiao, X. *et al.* A Unique Fe-N<sub>4</sub> Coordination System Enabling Transformation of Oxygen into Superoxide for Photocatalytic C-H Activation with High Efficiency and Selectivity. *Adv. Mater.* **34**, 2200612 (2022).
14. Liu, G. *et al.* A series of highly stable porphyrinic metal-organic frameworks based on iron-oxo chain clusters: design, synthesis and biomimetic catalysis. *J. Mater. Chem. A* **8**, 8376-8382 (2020).
15. Chen, H. *et al.* Selective Functionalization of Hydrocarbons Using a ppm Bioinspired Molecular Tweezer via Proton-Coupled Electron Transfer. *ACS Catal.* **11**, 6810-6815 (2021).
16. Tavallaei, H. *et al.* A Cooperative Effect in a Novel Bimetallic Mo-V Nanocomplex Catalyzed Selective Aerobic C-H Oxidation. *ACS Omega* **4**, 3601-3610 (2019).
17. Saha, R. & Sekar, G. Selective oxidation of alkylarenes to aromatic acids/ketone in water by using reusable binaphthyl stabilized Pt nanoparticles (Pt-BNP) as catalyst. *Appl. Catal. B* **250**, 325-336 (2019).
18. Wu, H. *et al.* Preparation of Copper Phosphate from Naturally Occurring Phytic Acid as an Advanced Catalyst for Oxidation of Aromatic Benzyl Compounds. *ACS Sustainable Chem. Eng.* **6**, 13670-13675 (2018).
19. Aguadero, A. *et al.* An Oxygen-Deficient Perovskite as Selective Catalyst in the Oxidation of Alkyl Benzenes. *Angew. Chem. Int. Ed.* **50**, 6557-6561 (2011).

- 20 Gao, Y. *et al.* Nitrogen-Doped sp<sup>2</sup>-Hybridized Carbon as a Superior Catalyst for Selective Oxidation. *Angew. Chem. Int. Ed.* **52**, 2109-2113 (2013).
- 21 Kimberley, L. *et al.* The Origin of Catalytic Benzylic C-H Oxidation over a Redox-Active Metal-Organic Framework. *Angew. Chem. Int. Ed.* **60**, 15243-15247 (2021).
- 22 Zhou, J. *et al.* Chemoselective Oxyfunctionalization of Functionalized Benzylic Compounds with a Manganese Catalyst. *Angew. Chem. Int. Ed.* **61**, e202205983 (2022).
- 23 Sun, Y. *et al.* Nitrogen, Sulfur Co-doped Carbon Materials Derived from the Leaf, Stem and Root of Amaranth as Metal-free Catalysts for Selective Oxidation of Aromatic Hydrocarbons. *ChemCatChem* **11**, 1010-1016 (2019).
- 24 Yang, G., Ma, Y. & Xu, J. Biomimetic Catalytic System Driven by Electron Transfer for Selective Oxygenation of Hydrocarbon. *J. Am. Chem. Soc.* **126**, 10542-10543 (2004).
- 25 Liu, W. *et al.* Discriminating Catalytically Active FeN<sub>x</sub> Species of Atomically Dispersed Fe–N–C Catalyst for Selective Oxidation of the C-H Bond. *J. Am. Chem. Soc.* **139**, 10790-10798 (2017).
- 26 Liu, P. *et al.* ChemInform Abstract: Iron Oligopyridine Complexes as Efficient Catalysts for Practical Oxidation of Arenes, Alkanes, Tertiary Amines and N-Acyl Cyclic Amines with Oxone. *Chem. Sci.* **2**, 2187-2195 (2011).
- 27 Zhang, P. *et al.* Solvent-free aerobic oxidation of hydrocarbons and alcohols with Pd@N-doped carbon from glucose. *Nat. Commun.* **4**, 1593 (2013).
- 28 Yi, C. S., Kwon, K.-H. & Lee, D. W. Aqueous Phase C-H Bond Oxidation Reaction of Arylalkanes Catalyzed by a Water-Soluble Cationic Ru(III) Complex [(pymox-Me<sub>2</sub>)<sub>2</sub>RuCl<sub>2</sub>]<sup>+</sup>BF<sub>4</sub><sup>-</sup>. *Org. Lett.* **11**, 1567-1569 (2009).
